# Supplementary material for: Tissue Localization and Extracellular Matrix Degradation by PI, PII and PIII Snake Venom Metalloproteinases: Clues on the Mechanisms of Venom-Induced Hemorrhage
Source: PubMed Central journal article supplement (PMC4409213; doi:10.1371/journal.pntd.0003731), 2015-04-24
Supplement: pntd.0003731.s001.pdf [file pntd.0003731.s001.pdf]

**S1 Table. List of all proteins identified in wound exudates collected from mice injected with PI (*B. asper*), PII (*B. lateralis*) and PIII (*C. simus*) SVMPs.**

| Bio Sample | MS/MS Sample name | M.W.    | Protein identification probability | Protein percentage of total spectra | Exclusive unique peptide count | Exclusive unique peptide count | Total spectrum count | Percentage sequence coverage |
|------------|-------------------|---------|------------------------------------|-------------------------------------|--------------------------------|--------------------------------|----------------------|------------------------------|
| B_asper    | Mudpit_v140219v02 | 28 kDa  | 100%                               | 0.00%                               | 2                              | 2                              | 3                    | 10%                          |
| B_asper    | Mudpit_v140219v02 | 29 kDa  | 100%                               | 0.00%                               | 1                              | 1                              | 1                    | 5%                           |
| B_asper    | Mudpit_v140219v02 | 28 kDa  | 100%                               | 0.00%                               | 2                              | 2                              | 2                    | 10%                          |
| B_asper    | Mudpit_v140219v02 | 32 kDa  | 11%                                | 0.00%                               | 0                              | 0                              | 0                    | 0%                           |
| B_asper    | Mudpit_v140219v02 | 53 kDa  | 44%                                | 0.00%                               | 1                              | 1                              | 1                    | 2%                           |
| B_asper    | Mudpit_v140219v02 | 21 kDa  | 99%                                | 0.00%                               | 1                              | 1                              | 1                    | 6%                           |
| B_asper    | Mudpit_v140219v02 | 42 kDa  | 98%                                | 0.02%                               | 0                              | 0                              | 17                   | 21%                          |
| B_asper    | Mudpit_v140219v02 | 42 kDa  | 100%                               | 0.02%                               | 4                              | 4                              | 20                   | 28%                          |
| B_asper    | Mudpit_v140219v02 | 42 kDa  | 80%                                | 0.02%                               | 0                              | 0                              | 17                   | 21%                          |
| B_asper    | Mudpit_v140219v02 | 48 kDa  | 95%                                | 0.00%                               | 1                              | 1                              | 1                    | 3%                           |
| B_asper    | Mudpit_v140219v02 | 22 kDa  | 99%                                | 0.00%                               | 1                              | 1                              | 1                    | 5%                           |
| B_asper    | Mudpit_v140219v02 | 27 kDa  | 100%                               | 0.00%                               | 1                              | 1                              | 3                    | 10%                          |
| B_asper    | Mudpit_v140219v02 | 24 kDa  | 99%                                | 0.00%                               | 0                              | 0                              | 1                    | 9%                           |
| B_asper    | Mudpit_v140219v02 | 24 kDa  | 100%                               | 0.00%                               | 0                              | 0                              | 1                    | 9%                           |
| B_asper    | Mudpit_v140219v02 | 46 kDa  | 100%                               | 0.07%                               | 6                              | 10                             | 70                   | 36%                          |
| B_asper    | Mudpit_v140219v02 | 46 kDa  | 100%                               | 0.08%                               | 6                              | 13                             | 83                   | 39%                          |
| B_asper    | Mudpit_v140219v02 | 46 kDa  | 100%                               | 0.06%                               | 2                              | 3                              | 55                   | 29%                          |
| B_asper    | Mudpit_v140219v02 | 57 kDa  | 100%                               | 0.01%                               | 5                              | 7                              | 10                   | 10%                          |
| B_asper    | Mudpit_v140219v02 | 37 kDa  | 100%                               | 0.03%                               | 8                              | 16                             | 30                   | 33%                          |
| B_asper    | Mudpit_v140219v02 | 55 kDa  | 100%                               | 0.01%                               | 3                              | 4                              | 6                    | 5%                           |
| B_asper    | Mudpit_v140219v02 | 166 kDa | 100%                               | 0.22%                               | 0                              | 0                              | 220                  | 38%                          |
| B_asper    | Mudpit_v140219v02 | 167 kDa | 100%                               | 0.23%                               | 1                              | 2                              | 224                  | 40%                          |
| B_asper    | Mudpit_v140219v02 | 47 kDa  | 100%                               | 0.01%                               | 5                              | 5                              | 10                   | 23%                          |
| B_asper    | Mudpit_v140219v02 | 12 kDa  | 100%                               | 0.00%                               | 1                              | 1                              | 1                    | 12%                          |
| B_asper    | Mudpit_v140219v02 | 53 kDa  | 100%                               | 0.01%                               | 4                              | 5                              | 5                    | 13%                          |
| B_asper    | Mudpit_v140219v02 | 52 kDa  | 100%                               | 0.02%                               | 9                              | 10                             | 18                   | 25%                          |
| B_asper    | Mudpit_v140219v02 | 31 kDa  | 100%                               | 0.07%                               | 17                             | 24                             | 71                   | 56%                          |
| B_asper    | Mudpit_v140219v02 | 11 kDa  | 100%                               | 0.02%                               | 2                              | 2                              | 21                   | 19%                          |

| <b>Bio Sample</b> | <b>MS/MS Sample name</b> | <b>M.W.</b> | <b>Protein identification probability</b> | <b>Protein percentage of total spectra</b> | <b>Exclusive unique peptide count</b> | <b>Exclusive unique peptide count</b> | <b>Total spectrum count</b> | <b>Percentage sequence coverage</b> |
|-------------------|--------------------------|-------------|-------------------------------------------|--------------------------------------------|---------------------------------------|---------------------------------------|-----------------------------|-------------------------------------|
| B_asper           | Mudpit_v140219v02        | 45 kDa      | 100%                                      | 0.02%                                      | 10                                    | 10                                    | 20                          | 27%                                 |
| B_asper           | Mudpit_v140219v02        | 504 kDa     | 100%                                      | 0.02%                                      | 14                                    | 15                                    | 23                          | 3%                                  |
| B_asper           | Mudpit_v140219v02        | 22 kDa      | 100%                                      | 0.00%                                      | 2                                     | 3                                     | 4                           | 13%                                 |
| B_asper           | Mudpit_v140219v02        | 36 kDa      | 100%                                      | 0.04%                                      | 10                                    | 16                                    | 37                          | 35%                                 |
| B_asper           | Mudpit_v140219v02        | 46 kDa      | 100%                                      | 0.00%                                      | 3                                     | 3                                     | 3                           | 10%                                 |
| B_asper           | Mudpit_v140219v02        | 469 kDa     | 100%                                      | 0.00%                                      | 0                                     | 0                                     | 4                           | 1%                                  |
| B_asper           | Mudpit_v140219v02        | 39 kDa      | 100%                                      | 0.01%                                      | 4                                     | 4                                     | 6                           | 12%                                 |
| B_asper           | Mudpit_v140219v02        | 47 kDa      | 100%                                      | 0.02%                                      | 7                                     | 11                                    | 20                          | 31%                                 |
| B_asper           | Mudpit_v140219v02        | 16 kDa      | 100%                                      | 0.15%                                      | 4                                     | 8                                     | 147                         | 90%                                 |
| B_asper           | Mudpit_v140219v02        | 30 kDa      | 100%                                      | 0.01%                                      | 3                                     | 3                                     | 5                           | 23%                                 |
| B_asper           | Mudpit_v140219v02        | 25 kDa      | 100%                                      | 0.00%                                      | 2                                     | 2                                     | 2                           | 18%                                 |
| B_asper           | Mudpit_v140219v02        | 52 kDa      | 98%                                       | 0.00%                                      | 0                                     | 0                                     | 0                           | 0%                                  |
| B_asper           | Mudpit_v140219v02        | 39 kDa      | 100%                                      | 0.00%                                      | 3                                     | 3                                     | 3                           | 10%                                 |
| B_asper           | Mudpit_v140219v02        | 17 kDa      | 100%                                      | 0.00%                                      | 1                                     | 1                                     | 1                           | 11%                                 |
| B_asper           | Mudpit_v140219v02        | 25 kDa      | 100%                                      | 0.00%                                      | 2                                     | 2                                     | 3                           | 12%                                 |
| B_asper           | Mudpit_v140219v02        | 28 kDa      | 100%                                      | 0.01%                                      | 4                                     | 6                                     | 6                           | 17%                                 |
| B_asper           | Mudpit_v140219v02        | 29 kDa      | 100%                                      | 0.01%                                      | 7                                     | 10                                    | 11                          | 37%                                 |
| B_asper           | Mudpit_v140219v02        | 29 kDa      | 100%                                      | 0.01%                                      | 7                                     | 7                                     | 9                           | 39%                                 |
| B_asper           | Mudpit_v140219v02        | 61 kDa      | 100%                                      | 0.07%                                      | 7                                     | 13                                    | 65                          | 30%                                 |
| B_asper           | Mudpit_v140219v02        | 52 kDa      | 100%                                      | 0.01%                                      | 3                                     | 3                                     | 5                           | 8%                                  |
| B_asper           | Mudpit_v140219v02        | 60 kDa      | 100%                                      | 0.01%                                      | 4                                     | 5                                     | 5                           | 9%                                  |
| B_asper           | Mudpit_v140219v02        | 60 kDa      | 100%                                      | 0.00%                                      | 2                                     | 2                                     | 2                           | 5%                                  |
| B_asper           | Mudpit_v140219v02        | 124 kDa     | 100%                                      | 0.12%                                      | 0                                     | 0                                     | 115                         | 40%                                 |
| B_asper           | Mudpit_v140219v02        | 124 kDa     | 100%                                      | 0.12%                                      | 1                                     | 1                                     | 118                         | 41%                                 |
| B_asper           | Mudpit_v140219v02        | 192 kDa     | 85%                                       | 0.00%                                      | 1                                     | 1                                     | 1                           | 1%                                  |
| B_asper           | Mudpit_v140219v02        | 52 kDa      | 99%                                       | 0.00%                                      | 1                                     | 1                                     | 1                           | 4%                                  |
| B_asper           | Mudpit_v140219v02        | 55 kDa      | 100%                                      | 0.00%                                      | 1                                     | 1                                     | 1                           | 2%                                  |
| B_asper           | Mudpit_v140219v02        | 66 kDa      | 100%                                      | 0.01%                                      | 2                                     | 3                                     | 10                          | 4%                                  |
| B_asper           | Mudpit_v140219v02        | 19 kDa      | 74%                                       | 0.00%                                      | 0                                     | 0                                     | 2                           | 7%                                  |
| B_asper           | Mudpit_v140219v02        | 19 kDa      | 49%                                       | 0.00%                                      | 0                                     | 0                                     | 2                           | 7%                                  |

| <b>Bio Sample</b> | <b>MS/MS Sample name</b> | <b>M.W.</b> | <b>Protein identification probability</b> | <b>Protein percentage of total spectra</b> | <b>Exclusive unique peptide count</b> | <b>Exclusive unique peptide count</b> | <b>Total spectrum count</b> | <b>Percentage sequence coverage</b> |
|-------------------|--------------------------|-------------|-------------------------------------------|--------------------------------------------|---------------------------------------|---------------------------------------|-----------------------------|-------------------------------------|
| B_asper           | Mudpit_v140219v02        | 138 kDa     | 100%                                      | 0.00%                                      | 3                                     | 3                                     | 3                           | 3%                                  |
| B_asper           | Mudpit_v140219v02        | 139 kDa     | 100%                                      | 0.01%                                      | 3                                     | 5                                     | 5                           | 3%                                  |
| B_asper           | Mudpit_v140219v02        | 193 kDa     | 100%                                      | 0.01%                                      | 7                                     | 8                                     | 9                           | 5%                                  |
| B_asper           | Mudpit_v140219v02        | 138 kDa     | 100%                                      | 0.00%                                      | 0                                     | 0                                     | 0                           | 0%                                  |
| B_asper           | Mudpit_v140219v02        | 130 kDa     | 100%                                      | 0.00%                                      | 3                                     | 3                                     | 3                           | 3%                                  |
| B_asper           | Mudpit_v140219v02        | 27 kDa      | 100%                                      | 0.00%                                      | 2                                     | 2                                     | 4                           | 10%                                 |
| B_asper           | Mudpit_v140219v02        | 26 kDa      | 100%                                      | 0.00%                                      | 1                                     | 1                                     | 1                           | 5%                                  |
| B_asper           | Mudpit_v140219v02        | 186 kDa     | 100%                                      | 0.41%                                      | 65                                    | 101                                   | 407                         | 46%                                 |
| B_asper           | Mudpit_v140219v02        | 193 kDa     | 100%                                      | 0.02%                                      | 11                                    | 13                                    | 22                          | 7%                                  |
| B_asper           | Mudpit_v140219v02        | 61 kDa      | 100%                                      | 0.00%                                      | 1                                     | 1                                     | 2                           | 2%                                  |
| B_asper           | Mudpit_v140219v02        | 23 kDa      | 100%                                      | 0.00%                                      | 3                                     | 3                                     | 4                           | 19%                                 |
| B_asper           | Mudpit_v140219v02        | 80 kDa      | 97%                                       | 0.01%                                      | 0                                     | 0                                     | 6                           | 8%                                  |
| B_asper           | Mudpit_v140219v02        | 141 kDa     | 100%                                      | 0.05%                                      | 18                                    | 30                                    | 47                          | 23%                                 |
| B_asper           | Mudpit_v140219v02        | 67 kDa      | 100%                                      | 0.01%                                      | 7                                     | 7                                     | 11                          | 14%                                 |
| B_asper           | Mudpit_v140219v02        | 45 kDa      | 100%                                      | 0.00%                                      | 2                                     | 2                                     | 2                           | 6%                                  |
| B_asper           | Mudpit_v140219v02        | 43 kDa      | 100%                                      | 0.06%                                      | 15                                    | 25                                    | 60                          | 49%                                 |
| B_asper           | Mudpit_v140219v02        | 36 kDa      | 100%                                      | 0.00%                                      | 2                                     | 2                                     | 2                           | 10%                                 |
| B_asper           | Mudpit_v140219v02        | 50 kDa      | 100%                                      | 0.01%                                      | 3                                     | 5                                     | 11                          | 11%                                 |
| B_asper           | Mudpit_v140219v02        | 50 kDa      | 100%                                      | 0.01%                                      | 2                                     | 2                                     | 7                           | 8%                                  |
| B_asper           | Mudpit_v140219v02        | 50 kDa      | 100%                                      | 0.00%                                      | 2                                     | 2                                     | 3                           | 5%                                  |
| B_asper           | Mudpit_v140219v02        | 95 kDa      | 100%                                      | 0.00%                                      | 0                                     | 0                                     | 0                           | 0%                                  |
| B_asper           | Mudpit_v140219v02        | 135 kDa     | 100%                                      | 0.01%                                      | 8                                     | 8                                     | 9                           | 9%                                  |
| B_asper           | Mudpit_v140219v02        | 46 kDa      | 99%                                       | 0.00%                                      | 0                                     | 0                                     | 1                           | 2%                                  |
| B_asper           | Mudpit_v140219v02        | 272 kDa     | 100%                                      | 0.01%                                      | 5                                     | 5                                     | 6                           | 2%                                  |
| B_asper           | Mudpit_v140219v02        | 15 kDa      | 100%                                      | 0.00%                                      | 3                                     | 3                                     | 3                           | 27%                                 |
| B_asper           | Mudpit_v140219v02        | 21 kDa      | 19%                                       | 0.00%                                      | 0                                     | 0                                     | 0                           | 0%                                  |
| B_asper           | Mudpit_v140219v02        | 43 kDa      | 100%                                      | 0.00%                                      | 3                                     | 3                                     | 4                           | 12%                                 |
| B_asper           | Mudpit_v140219v02        | 55 kDa      | 100%                                      | 0.12%                                      | 26                                    | 48                                    | 116                         | 56%                                 |
| B_asper           | Mudpit_v140219v02        | 49 kDa      | 100%                                      | 0.12%                                      | 23                                    | 45                                    | 116                         | 57%                                 |
| B_asper           | Mudpit_v140219v02        | 273 kDa     | 100%                                      | 0.08%                                      | 40                                    | 47                                    | 83                          | 24%                                 |

| <b>Bio Sample</b> | <b>MS/MS Sample name</b> | <b>M.W.</b> | <b>Protein identification probability</b> | <b>Protein percentage of total spectra</b> | <b>Exclusive unique peptide count</b> | <b>Exclusive unique peptide count</b> | <b>Total spectrum count</b> | <b>Percentage sequence coverage</b> |
|-------------------|--------------------------|-------------|-------------------------------------------|--------------------------------------------|---------------------------------------|---------------------------------------|-----------------------------|-------------------------------------|
| B_asper           | Mudpit_v140219v02        | 22 kDa      | 100%                                      | 0.00%                                      | 1                                     | 1                                     | 1                           | 5%                                  |
| B_asper           | Mudpit_v140219v02        | 39 kDa      | 100%                                      | 0.03%                                      | 2                                     | 2                                     | 28                          | 40%                                 |
| B_asper           | Mudpit_v140219v02        | 24 kDa      | 100%                                      | 0.00%                                      | 1                                     | 1                                     | 2                           | 10%                                 |
| B_asper           | Mudpit_v140219v02        | 47 kDa      | 91%                                       | 0.00%                                      | 0                                     | 0                                     | 3                           | 7%                                  |
| B_asper           | Mudpit_v140219v02        | 86 kDa      | 100%                                      | 0.03%                                      | 13                                    | 17                                    | 32                          | 20%                                 |
| B_asper           | Mudpit_v140219v02        | 23 kDa      | 11%                                       | 0.00%                                      | 0                                     | 0                                     | 2                           | 6%                                  |
| B_asper           | Mudpit_v140219v02        | 26 kDa      | 97%                                       | 0.00%                                      | 1                                     | 1                                     | 3                           | 11%                                 |
| B_asper           | Mudpit_v140219v02        | 24 kDa      | 100%                                      | 0.00%                                      | 2                                     | 3                                     | 3                           | 15%                                 |
| B_asper           | Mudpit_v140219v02        | 22 kDa      | 100%                                      | 0.00%                                      | 2                                     | 3                                     | 4                           | 14%                                 |
| B_asper           | Mudpit_v140219v02        | 25 kDa      | 100%                                      | 0.01%                                      | 3                                     | 3                                     | 5                           | 22%                                 |
| B_asper           | Mudpit_v140219v02        | 36 kDa      | 100%                                      | 0.01%                                      | 2                                     | 2                                     | 8                           | 30%                                 |
| B_asper           | Mudpit_v140219v02        | 35 kDa      | 100%                                      | 0.00%                                      | 2                                     | 2                                     | 2                           | 6%                                  |
| B_asper           | Mudpit_v140219v02        | 8 kDa       | 100%                                      | 0.00%                                      | 2                                     | 2                                     | 2                           | 46%                                 |
| B_asper           | Mudpit_v140219v02        | 97 kDa      | 100%                                      | 0.00%                                      | 0                                     | 0                                     | 1                           | 1%                                  |
| B_asper           | Mudpit_v140219v02        | 51 kDa      | 95%                                       | 0.00%                                      | 1                                     | 1                                     | 1                           | 2%                                  |
| B_asper           | Mudpit_v140219v02        | 37 kDa      | 100%                                      | 0.01%                                      | 4                                     | 5                                     | 7                           | 19%                                 |
| B_asper           | Mudpit_v140219v02        | 71 kDa      | 79%                                       | 0.00%                                      | 0                                     | 0                                     | 1                           | 2%                                  |
| B_asper           | Mudpit_v140219v02        | 39 kDa      | 100%                                      | 0.05%                                      | 14                                    | 25                                    | 48                          | 41%                                 |
| B_asper           | Mudpit_v140219v02        | 69 kDa      | 100%                                      | 0.02%                                      | 7                                     | 7                                     | 17                          | 20%                                 |
| B_asper           | Mudpit_v140219v02        | 85 kDa      | 100%                                      | 0.00%                                      | 0                                     | 0                                     | 2                           | 3%                                  |
| B_asper           | Mudpit_v140219v02        | 83 kDa      | 100%                                      | 0.01%                                      | 2                                     | 2                                     | 6                           | 10%                                 |
| B_asper           | Mudpit_v140219v02        | 15 kDa      | 100%                                      | 0.07%                                      | 7                                     | 15                                    | 70                          | 63%                                 |
| B_asper           | Mudpit_v140219v02        | 16 kDa      | 100%                                      | 0.19%                                      | 2                                     | 7                                     | 189                         | 90%                                 |
| B_asper           | Mudpit_v140219v02        | 16 kDa      | 100%                                      | 0.14%                                      | 6                                     | 14                                    | 137                         | 86%                                 |
| B_asper           | Mudpit_v140219v02        | 16 kDa      | 6%                                        | 0.02%                                      | 0                                     | 0                                     | 16                          | 7%                                  |
| B_asper           | Mudpit_v140219v02        | 51 kDa      | 100%                                      | 0.10%                                      | 23                                    | 40                                    | 101                         | 44%                                 |
| B_asper           | Mudpit_v140219v02        | 59 kDa      | 100%                                      | 0.01%                                      | 7                                     | 9                                     | 13                          | 15%                                 |
| B_asper           | Mudpit_v140219v02        | 14 kDa      | 100%                                      | 0.00%                                      | 0                                     | 0                                     | 1                           | 7%                                  |
| B_asper           | Mudpit_v140219v02        | 11 kDa      | 100%                                      | 0.00%                                      | 2                                     | 3                                     | 3                           | 21%                                 |
| B_asper           | Mudpit_v140219v02        | 34 kDa      | 89%                                       | 0.00%                                      | 1                                     | 1                                     | 1                           | 3%                                  |

| <b>Bio Sample</b> | <b>MS/MS Sample name</b> | <b>M.W.</b> | <b>Protein identification probability</b> | <b>Protein percentage of total spectra</b> | <b>Exclusive unique peptide count</b> | <b>Exclusive unique peptide count</b> | <b>Total spectrum count</b> | <b>Percentage sequence coverage</b> |
|-------------------|--------------------------|-------------|-------------------------------------------|--------------------------------------------|---------------------------------------|---------------------------------------|-----------------------------|-------------------------------------|
| B_asper           | Mudpit_v140219v02        | 43 kDa      | 100%                                      | 0.02%                                      | 5                                     | 7                                     | 17                          | 17%                                 |
| B_asper           | Mudpit_v140219v02        | 44 kDa      | 100%                                      | 0.02%                                      | 5                                     | 8                                     | 17                          | 18%                                 |
| B_asper           | Mudpit_v140219v02        | 44 kDa      | 100%                                      | 0.01%                                      | 3                                     | 3                                     | 6                           | 10%                                 |
| B_asper           | Mudpit_v140219v02        | 44 kDa      | 100%                                      | 0.00%                                      | 2                                     | 2                                     | 2                           | 8%                                  |
| B_asper           | Mudpit_v140219v02        | 13 kDa      | 100%                                      | 0.00%                                      | 2                                     | 2                                     | 2                           | 28%                                 |
| B_asper           | Mudpit_v140219v02        | 15 kDa      | 99%                                       | 0.00%                                      | 1                                     | 1                                     | 4                           | 16%                                 |
| B_asper           | Mudpit_v140219v02        | 12 kDa      | 100%                                      | 0.03%                                      | 5                                     | 9                                     | 33                          | 49%                                 |
| B_asper           | Mudpit_v140219v02        | 12 kDa      | 100%                                      | 0.00%                                      | 2                                     | 2                                     | 2                           | 36%                                 |
| B_asper           | Mudpit_v140219v02        | 14 kDa      | 99%                                       | 0.00%                                      | 1                                     | 1                                     | 1                           | 12%                                 |
| B_asper           | Mudpit_v140219v02        | 50 kDa      | 100%                                      | 0.01%                                      | 5                                     | 6                                     | 14                          | 16%                                 |
| B_asper           | Mudpit_v140219v02        | 18 kDa      | 99%                                       | 0.00%                                      | 1                                     | 1                                     | 2                           | 9%                                  |
| B_asper           | Mudpit_v140219v02        | 77 kDa      | 100%                                      | 0.03%                                      | 15                                    | 16                                    | 31                          | 24%                                 |
| B_asper           | Mudpit_v140219v02        | 105 kDa     | 100%                                      | 0.02%                                      | 16                                    | 19                                    | 23                          | 20%                                 |
| B_asper           | Mudpit_v140219v02        | 106 kDa     | 100%                                      | 0.01%                                      | 7                                     | 7                                     | 11                          | 7%                                  |
| B_asper           | Mudpit_v140219v02        | 102 kDa     | 100%                                      | 0.01%                                      | 10                                    | 10                                    | 14                          | 15%                                 |
| B_asper           | Mudpit_v140219v02        | 99 kDa      | 100%                                      | 0.00%                                      | 3                                     | 3                                     | 3                           | 4%                                  |
| B_asper           | Mudpit_v140219v02        | 74 kDa      | 87%                                       | 0.00%                                      | 0                                     | 0                                     | 0                           | 0%                                  |
| B_asper           | Mudpit_v140219v02        | 28 kDa      | 100%                                      | 0.01%                                      | 3                                     | 3                                     | 6                           | 13%                                 |
| B_asper           | Mudpit_v140219v02        | 81 kDa      | 100%                                      | 0.01%                                      | 7                                     | 7                                     | 11                          | 10%                                 |
| B_asper           | Mudpit_v140219v02        | 70 kDa      | 100%                                      | 0.02%                                      | 9                                     | 11                                    | 17                          | 18%                                 |
| B_asper           | Mudpit_v140219v02        | 50 kDa      | 100%                                      | 0.02%                                      | 3                                     | 3                                     | 23                          | 11%                                 |
| B_asper           | Mudpit_v140219v02        | 48 kDa      | 100%                                      | 0.09%                                      | 1                                     | 1                                     | 88                          | 36%                                 |
| B_asper           | Mudpit_v140219v02        | 58 kDa      | 100%                                      | 0.01%                                      | 6                                     | 6                                     | 8                           | 16%                                 |
| B_asper           | Mudpit_v140219v02        | 47 kDa      | 97%                                       | 0.01%                                      | 0                                     | 0                                     | 11                          | 19%                                 |
| B_asper           | Mudpit_v140219v02        | 46 kDa      | 100%                                      | 0.01%                                      | 0                                     | 0                                     | 7                           | 12%                                 |
| B_asper           | Mudpit_v140219v02        | 46 kDa      | 98%                                       | 0.01%                                      | 0                                     | 0                                     | 11                          | 20%                                 |
| B_asper           | Mudpit_v140219v02        | 45 kDa      | 91%                                       | 0.01%                                      | 0                                     | 0                                     | 8                           | 16%                                 |
| B_asper           | Mudpit_v140219v02        | 51 kDa      | 100%                                      | 0.01%                                      | 3                                     | 3                                     | 8                           | 14%                                 |
| B_asper           | Mudpit_v140219v02        | 48 kDa      | 53%                                       | 0.00%                                      | 0                                     | 0                                     | 4                           | 3%                                  |
| B_asper           | Mudpit_v140219v02        | 52 kDa      | 100%                                      | 0.01%                                      | 0                                     | 0                                     | 8                           | 3%                                  |

| <b>Bio Sample</b> | <b>MS/MS Sample name</b> | <b>M.W.</b> | <b>Protein identification probability</b> | <b>Protein percentage of total spectra</b> | <b>Exclusive unique peptide count</b> | <b>Exclusive unique peptide count</b> | <b>Total spectrum count</b> | <b>Percentage sequence coverage</b> |
|-------------------|--------------------------|-------------|-------------------------------------------|--------------------------------------------|---------------------------------------|---------------------------------------|-----------------------------|-------------------------------------|
| B_asper           | Mudpit_v140219v02        | 48 kDa      | 100%                                      | 0.01%                                      | 1                                     | 1                                     | 8                           | 8%                                  |
| B_asper           | Mudpit_v140219v02        | 49 kDa      | 75%                                       | 0.00%                                      | 0                                     | 0                                     | 3                           | 6%                                  |
| B_asper           | Mudpit_v140219v02        | 57 kDa      | 99%                                       | 0.01%                                      | 0                                     | 0                                     | 5                           | 4%                                  |
| B_asper           | Mudpit_v140219v02        | 56 kDa      | 100%                                      | 0.03%                                      | 1                                     | 2                                     | 28                          | 23%                                 |
| B_asper           | Mudpit_v140219v02        | 53 kDa      | 100%                                      | 0.03%                                      | 0                                     | 0                                     | 30                          | 27%                                 |
| B_asper           | Mudpit_v140219v02        | 66 kDa      | 100%                                      | 0.02%                                      | 2                                     | 3                                     | 17                          | 4%                                  |
| B_asper           | Mudpit_v140219v02        | 71 kDa      | 100%                                      | 0.01%                                      | 2                                     | 3                                     | 9                           | 3%                                  |
| B_asper           | Mudpit_v140219v02        | 63 kDa      | 100%                                      | 0.01%                                      | 1                                     | 2                                     | 6                           | 3%                                  |
| B_asper           | Mudpit_v140219v02        | 62 kDa      | 100%                                      | 0.01%                                      | 2                                     | 2                                     | 9                           | 7%                                  |
| B_asper           | Mudpit_v140219v02        | 60 kDa      | 72%                                       | 0.01%                                      | 0                                     | 0                                     | 5                           | 5%                                  |
| B_asper           | Mudpit_v140219v02        | 60 kDa      | 99%                                       | 0.01%                                      | 0                                     | 0                                     | 5                           | 5%                                  |
| B_asper           | Mudpit_v140219v02        | 53 kDa      | 99%                                       | 0.08%                                      | 0                                     | 0                                     | 79                          | 31%                                 |
| B_asper           | Mudpit_v140219v02        | 37 kDa      | 68%                                       | 0.01%                                      | 0                                     | 0                                     | 5                           | 4%                                  |
| B_asper           | Mudpit_v140219v02        | 40 kDa      | 100%                                      | 0.02%                                      | 8                                     | 8                                     | 17                          | 26%                                 |
| B_asper           | Mudpit_v140219v02        | 37 kDa      | 100%                                      | 0.01%                                      | 3                                     | 5                                     | 10                          | 11%                                 |
| B_asper           | Mudpit_v140219v02        | 38 kDa      | 100%                                      | 0.01%                                      | 4                                     | 4                                     | 8                           | 12%                                 |
| B_asper           | Mudpit_v140219v02        | 26 kDa      | 100%                                      | 0.00%                                      | 2                                     | 2                                     | 2                           | 8%                                  |
| B_asper           | Mudpit_v140219v02        | 21 kDa      | 92%                                       | 0.00%                                      | 0                                     | 0                                     | 1                           | 6%                                  |
| B_asper           | Mudpit_v140219v02        | 37 kDa      | 100%                                      | 0.00%                                      | 3                                     | 3                                     | 4                           | 12%                                 |
| B_asper           | Mudpit_v140219v02        | 209 kDa     | 100%                                      | 0.00%                                      | 2                                     | 2                                     | 3                           | 1%                                  |
| B_asper           | Mudpit_v140219v02        | 26 kDa      | 100%                                      | 0.01%                                      | 3                                     | 3                                     | 9                           | 14%                                 |
| B_asper           | Mudpit_v140219v02        | 165 kDa     | 100%                                      | 0.11%                                      | 17                                    | 23                                    | 107                         | 33%                                 |
| B_asper           | Mudpit_v140219v02        | 162 kDa     | 100%                                      | 0.06%                                      | 5                                     | 5                                     | 62                          | 20%                                 |
| B_asper           | Mudpit_v140219v02        | 17 kDa      | 100%                                      | 0.00%                                      | 2                                     | 2                                     | 2                           | 21%                                 |
| B_asper           | Mudpit_v140219v02        | 14 kDa      | 100%                                      | 0.00%                                      | 3                                     | 3                                     | 4                           | 29%                                 |
| B_asper           | Mudpit_v140219v02        | 137 kDa     | 100%                                      | 0.00%                                      | 2                                     | 2                                     | 3                           | 2%                                  |
| B_asper           | Mudpit_v140219v02        | 17 kDa      | 89%                                       | 0.00%                                      | 0                                     | 0                                     | 1                           | 6%                                  |
| B_asper           | Mudpit_v140219v02        | 30 kDa      | 100%                                      | 0.00%                                      | 1                                     | 1                                     | 2                           | 6%                                  |
| B_asper           | Mudpit_v140219v02        | 12 kDa      | 100%                                      | 0.01%                                      | 5                                     | 6                                     | 8                           | 54%                                 |
| B_asper           | Mudpit_v140219v02        | 18 kDa      | 100%                                      | 0.01%                                      | 5                                     | 5                                     | 6                           | 30%                                 |

| <b>Bio Sample</b> | <b>MS/MS Sample name</b> | <b>M.W.</b> | <b>Protein identification probability</b> | <b>Protein percentage of total spectra</b> | <b>Exclusive unique peptide count</b> | <b>Exclusive unique peptide count</b> | <b>Total spectrum count</b> | <b>Percentage sequence coverage</b> |
|-------------------|--------------------------|-------------|-------------------------------------------|--------------------------------------------|---------------------------------------|---------------------------------------|-----------------------------|-------------------------------------|
| B_asper           | Mudpit_v140219v02        | 25 kDa      | 100%                                      | 0.00%                                      | 3                                     | 3                                     | 3                           | 19%                                 |
| B_asper           | Mudpit_v140219v02        | 22 kDa      | 100%                                      | 0.00%                                      | 0                                     | 0                                     | 3                           | 10%                                 |
| B_asper           | Mudpit_v140219v02        | 22 kDa      | 100%                                      | 0.01%                                      | 5                                     | 6                                     | 6                           | 27%                                 |
| B_asper           | Mudpit_v140219v02        | 50 kDa      | 81%                                       | 0.00%                                      | 0                                     | 0                                     | 0                           | 0%                                  |
| B_asper           | Mudpit_v140219v02        | 21 kDa      | 100%                                      | 0.00%                                      | 3                                     | 3                                     | 4                           | 28%                                 |
| B_asper           | Mudpit_v140219v02        | 93 kDa      | 100%                                      | 0.01%                                      | 8                                     | 9                                     | 13                          | 11%                                 |
| B_asper           | Mudpit_v140219v02        | 61 kDa      | 100%                                      | 0.00%                                      | 2                                     | 2                                     | 2                           | 4%                                  |
| B_asper           | Mudpit_v140219v02        | 45 kDa      | 100%                                      | 0.01%                                      | 4                                     | 4                                     | 7                           | 16%                                 |
| B_asper           | Mudpit_v140219v02        | 29 kDa      | 100%                                      | 0.01%                                      | 1                                     | 1                                     | 7                           | 9%                                  |
| B_asper           | Mudpit_v140219v02        | 29 kDa      | 100%                                      | 0.01%                                      | 3                                     | 3                                     | 10                          | 17%                                 |
| B_asper           | Mudpit_v140219v02        | 46 kDa      | 100%                                      | 0.00%                                      | 1                                     | 1                                     | 2                           | 3%                                  |
| B_asper           | Mudpit_v140219v02        | 71 kDa      | 100%                                      | 0.01%                                      | 7                                     | 7                                     | 11                          | 13%                                 |
| B_asper           | Mudpit_v140219v02        | 56 kDa      | 100%                                      | 0.01%                                      | 5                                     | 5                                     | 11                          | 12%                                 |
| B_asper           | Mudpit_v140219v02        | 91 kDa      | 100%                                      | 0.06%                                      | 25                                    | 35                                    | 60                          | 38%                                 |
| B_asper           | Mudpit_v140219v02        | 37 kDa      | 8%                                        | 0.00%                                      | 0                                     | 0                                     | 0                           | 0%                                  |
| B_asper           | Mudpit_v140219v02        | 83 kDa      | 92%                                       | 0.00%                                      | 0                                     | 0                                     | 3                           | 4%                                  |
| B_asper           | Mudpit_v140219v02        | 50 kDa      | 100%                                      | 0.00%                                      | 2                                     | 3                                     | 4                           | 7%                                  |
| B_asper           | Mudpit_v140219v02        | 29 kDa      | 40%                                       | 0.00%                                      | 1                                     | 1                                     | 1                           | 5%                                  |
| B_asper           | Mudpit_v140219v02        | 39 kDa      | 100%                                      | 0.00%                                      | 4                                     | 4                                     | 4                           | 10%                                 |
| B_asper           | Mudpit_v140219v02        | 62 kDa      | 100%                                      | 0.03%                                      | 2                                     | 2                                     | 33                          | 13%                                 |
| B_asper           | Mudpit_v140219v02        | 354 kDa     | 100%                                      | 0.01%                                      | 6                                     | 6                                     | 8                           | 2%                                  |
| B_asper           | Mudpit_v140219v02        | 20 kDa      | 50%                                       | 0.00%                                      | 0                                     | 0                                     | 0                           | 0%                                  |
| B_asper           | Mudpit_v140219v02        | 87 kDa      | 100%                                      | 0.07%                                      | 16                                    | 26                                    | 72                          | 20%                                 |
| B_asper           | Mudpit_v140219v02        | 108 kDa     | 100%                                      | 0.53%                                      | 0                                     | 0                                     | 520                         | 46%                                 |
| B_asper           | Mudpit_v140219v02        | 142 kDa     | 100%                                      | 0.01%                                      | 1                                     | 1                                     | 9                           | 6%                                  |
| B_asper           | Mudpit_v140219v02        | 40 kDa      | 95%                                       | 0.00%                                      | 0                                     | 0                                     | 2                           | 5%                                  |
| B_asper           | Mudpit_v140219v02        | 44 kDa      | 100%                                      | 0.01%                                      | 1                                     | 1                                     | 7                           | 15%                                 |
| B_asper           | Mudpit_v140219v02        | 112 kDa     | 100%                                      | 0.01%                                      | 1                                     | 1                                     | 6                           | 2%                                  |
| B_asper           | Mudpit_v140219v02        | 340 kDa     | 100%                                      | 0.01%                                      | 8                                     | 8                                     | 10                          | 4%                                  |
| B_asper           | Mudpit_v140219v02        | 70 kDa      | 100%                                      | 0.01%                                      | 1                                     | 1                                     | 6                           | 11%                                 |

| Bio Sample | MS/MS Sample name | M.W.    | Protein identification probability | Protein percentage of total spectra | Exclusive unique peptide count | Exclusive unique peptide count | Total spectrum count | Percentage sequence coverage |
|------------|-------------------|---------|------------------------------------|-------------------------------------|--------------------------------|--------------------------------|----------------------|------------------------------|
| B_asper    | Mudpit_v140219v02 | 32 kDa  | 76%                                | 0.00%                               | 1                              | 1                              | 1                    | 3%                           |
| B_asper    | Mudpit_v140219v02 | 62 kDa  | 93%                                | 0.00%                               | 0                              | 0                              | 2                    | 2%                           |
| B_asper    | Mudpit_v140219v02 | 24 kDa  | 32%                                | 0.00%                               | 0                              | 0                              | 0                    | 0%                           |
| B_asper    | Mudpit_v140219v02 | 23 kDa  | 100%                               | 0.00%                               | 1                              | 1                              | 1                    | 9%                           |
| B_asper    | Mudpit_v140219v02 | 23 kDa  | 100%                               | 0.00%                               | 1                              | 1                              | 1                    | 7%                           |
| B_asper    | Mudpit_v140219v02 | 53 kDa  | 58%                                | 0.00%                               | 0                              | 0                              | 0                    | 0%                           |
| B_asper    | Mudpit_v140219v02 | 43 kDa  | 100%                               | 0.00%                               | 2                              | 2                              | 2                    | 7%                           |
| B_asper    | Mudpit_v140219v02 | 47 kDa  | 100%                               | 0.15%                               | 17                             | 32                             | 152                  | 58%                          |
| B_asper    | Mudpit_v140219v02 | 47 kDa  | 100%                               | 0.05%                               | 3                              | 3                              | 54                   | 27%                          |
| B_asper    | Mudpit_v140219v02 | 47 kDa  | 100%                               | 0.04%                               | 0                              | 0                              | 37                   | 6%                           |
| B_asper    | Mudpit_v140219v02 | 77 kDa  | 100%                               | 0.55%                               | 3                              | 7                              | 541                  | 68%                          |
| B_asper    | Mudpit_v140219v02 | 69 kDa  | 100%                               | 1.09%                               | 52                             | 170                            | 1077                 | 78%                          |
| B_asper    | Mudpit_v140219v02 | 15 kDa  | 100%                               | 0.01%                               | 3                              | 3                              | 7                    | 22%                          |
| B_asper    | Mudpit_v140219v02 | 26 kDa  | 100%                               | 0.01%                               | 6                              | 8                              | 11                   | 26%                          |
| B_asper    | Mudpit_v140219v02 | 40 kDa  | 100%                               | 0.01%                               | 4                              | 4                              | 6                    | 14%                          |
| B_asper    | Mudpit_v140219v02 | 83 kDa  | 100%                               | 0.00%                               | 0                              | 0                              | 0                    | 0%                           |
| B_asper    | Mudpit_v140219v02 | 16 kDa  | 100%                               | 0.01%                               | 3                              | 3                              | 5                    | 23%                          |
| B_asper    | Mudpit_v140219v02 | 12 kDa  | 100%                               | 0.00%                               | 2                              | 2                              | 2                    | 21%                          |
| B_asper    | Mudpit_v140219v02 | 106 kDa | 100%                               | 0.00%                               | 2                              | 3                              | 4                    | 3%                           |
| B_asper    | Mudpit_v140219v02 | 48 kDa  | 100%                               | 0.00%                               | 1                              | 1                              | 1                    | 3%                           |
| B_asper    | Mudpit_v140219v02 | 86 kDa  | 100%                               | 0.00%                               | 2                              | 2                              | 2                    | 3%                           |
| B_asper    | Mudpit_v140219v02 | 89 kDa  | 100%                               | 0.00%                               | 1                              | 1                              | 2                    | 2%                           |
| B_asper    | Mudpit_v140219v02 | 68 kDa  | 100%                               | 0.00%                               | 1                              | 1                              | 1                    | 4%                           |
| B_asper    | Mudpit_v140219v02 | 16 kDa  | 100%                               | 0.03%                               | 5                              | 6                              | 34                   | 47%                          |
| B_asper    | Mudpit_v140219v02 | 32 kDa  | 100%                               | 0.01%                               | 1                              | 1                              | 12                   | 17%                          |
| B_asper    | Mudpit_v140219v02 | 50 kDa  | 57%                                | 0.00%                               | 0                              | 0                              | 2                    | 4%                           |
| B_asper    | Mudpit_v140219v02 | 50 kDa  | 41%                                | 0.00%                               | 0                              | 0                              | 2                    | 4%                           |
| B_asper    | Mudpit_v140219v02 | 18 kDa  | 90%                                | 0.00%                               | 0                              | 0                              | 3                    | 19%                          |
| B_asper    | Mudpit_v140219v02 | 17 kDa  | 95%                                | 0.00%                               | 1                              | 1                              | 1                    | 7%                           |
| B_asper    | Mudpit_v140219v02 | 19 kDa  | 86%                                | 0.00%                               | 0                              | 0                              | 0                    | 0%                           |



| <b>Bio Sample</b> | <b>MS/MS Sample name</b> | <b>M.W.</b> | <b>Protein identification probability</b> | <b>Protein percentage of total spectra</b> | <b>Exclusive unique peptide count</b> | <b>Exclusive unique peptide count</b> | <b>Total spectrum count</b> | <b>Percentage sequence coverage</b> |
|-------------------|--------------------------|-------------|-------------------------------------------|--------------------------------------------|---------------------------------------|---------------------------------------|-----------------------------|-------------------------------------|
| B_asper           | Mudpit_v140219v02        | 118 kDa     | 13%                                       | 0.00%                                      | 0                                     | 0                                     | 0                           | 0%                                  |
| B_asper           | Mudpit_v140219v02        | 62 kDa      | 100%                                      | 0.00%                                      | 2                                     | 2                                     | 2                           | 9%                                  |
| B_asper           | Mudpit_v140219v02        | 54 kDa      | 100%                                      | 0.07%                                      | 24                                    | 43                                    | 65                          | 68%                                 |
| B_asper           | Mudpit_v140219v02        | 55 kDa      | 100%                                      | 0.01%                                      | 4                                     | 5                                     | 7                           | 9%                                  |
| B_asper           | Mudpit_v140219v02        | 35 kDa      | 100%                                      | 0.00%                                      | 3                                     | 3                                     | 4                           | 13%                                 |
| B_lateralis       | Mudpit_v140310v02        | 69 kDa      | 100%                                      | 1.07%                                      | 55                                    | 158                                   | 1095                        | 80%                                 |
| B_lateralis       | Mudpit_v140310v02        | 77 kDa      | 100%                                      | 0.41%                                      | 2                                     | 4                                     | 420                         | 68%                                 |
| B_lateralis       | Mudpit_v140310v02        | 108 kDa     | 100%                                      | 0.39%                                      | 0                                     | 0                                     | 403                         | 46%                                 |
| B_lateralis       | Mudpit_v140310v02        | 186 kDa     | 100%                                      | 0.29%                                      | 59                                    | 83                                    | 299                         | 46%                                 |
| B_lateralis       | Mudpit_v140310v02        | 16 kDa      | 100%                                      | 0.25%                                      | 7                                     | 18                                    | 254                         | 86%                                 |
| B_lateralis       | Mudpit_v140310v02        | 16 kDa      | 100%                                      | 0.32%                                      | 4                                     | 7                                     | 329                         | 90%                                 |
| B_lateralis       | Mudpit_v140310v02        | 16 kDa      | 100%                                      | 0.36%                                      | 3                                     | 7                                     | 365                         | 90%                                 |
| B_lateralis       | Mudpit_v140310v02        | 16 kDa      | 98%                                       | 0.02%                                      | 1                                     | 1                                     | 22                          | 12%                                 |
| B_lateralis       | Mudpit_v140310v02        | 167 kDa     | 100%                                      | 0.17%                                      | 1                                     | 2                                     | 176                         | 38%                                 |
| B_lateralis       | Mudpit_v140310v02        | 166 kDa     | 100%                                      | 0.17%                                      | 0                                     | 0                                     | 172                         | 37%                                 |
| B_lateralis       | Mudpit_v140310v02        | 31 kDa      | 100%                                      | 0.12%                                      | 18                                    | 34                                    | 120                         | 55%                                 |
| B_lateralis       | Mudpit_v140310v02        | 46 kDa      | 100%                                      | 0.08%                                      | 6                                     | 13                                    | 85                          | 37%                                 |
| B_lateralis       | Mudpit_v140310v02        | 46 kDa      | 100%                                      | 0.07%                                      | 5                                     | 7                                     | 70                          | 31%                                 |
| B_lateralis       | Mudpit_v140310v02        | 46 kDa      | 100%                                      | 0.06%                                      | 2                                     | 2                                     | 62                          | 27%                                 |
| B_lateralis       | Mudpit_v140310v02        | 47 kDa      | 100%                                      | 0.15%                                      | 15                                    | 27                                    | 152                         | 46%                                 |
| B_lateralis       | Mudpit_v140310v02        | 47 kDa      | 100%                                      | 0.03%                                      | 0                                     | 0                                     | 35                          | 16%                                 |
| B_lateralis       | Mudpit_v140310v02        | 47 kDa      | 100%                                      | 0.02%                                      | 2                                     | 2                                     | 25                          | 11%                                 |
| B_lateralis       | Mudpit_v140310v02        | 15 kDa      | 100%                                      | 0.19%                                      | 8                                     | 20                                    | 190                         | 69%                                 |
| B_lateralis       | Mudpit_v140310v02        | 165 kDa     | 100%                                      | 0.06%                                      | 13                                    | 17                                    | 60                          | 24%                                 |
| B_lateralis       | Mudpit_v140310v02        | 162 kDa     | 100%                                      | 0.04%                                      | 8                                     | 8                                     | 39                          | 19%                                 |
| B_lateralis       | Mudpit_v140310v02        | 51 kDa      | 100%                                      | 0.07%                                      | 22                                    | 34                                    | 73                          | 46%                                 |
| B_lateralis       | Mudpit_v140310v02        | 43 kDa      | 100%                                      | 0.06%                                      | 14                                    | 22                                    | 64                          | 48%                                 |
| B_lateralis       | Mudpit_v140310v02        | 48 kDa      | 100%                                      | 0.09%                                      | 1                                     | 1                                     | 87                          | 45%                                 |
| B_lateralis       | Mudpit_v140310v02        | 53 kDa      | 100%                                      | 0.08%                                      | 1                                     | 1                                     | 83                          | 41%                                 |
| B_lateralis       | Mudpit_v140310v02        | 124 kDa     | 100%                                      | 0.07%                                      | 1                                     | 1                                     | 73                          | 38%                                 |

| <b>Bio Sample</b> | <b>MS/MS Sample name</b> | <b>M.W.</b> | <b>Protein identification probability</b> | <b>Protein percentage of total spectra</b> | <b>Exclusive unique peptide count</b> | <b>Exclusive unique peptide count</b> | <b>Total spectrum count</b> | <b>Percentage sequence coverage</b> |
|-------------------|--------------------------|-------------|-------------------------------------------|--------------------------------------------|---------------------------------------|---------------------------------------|-----------------------------|-------------------------------------|
| B_lateralis       | Mudpit_v140310v02        | 124 kDa     | 100%                                      | 0.07%                                      | 1                                     | 1                                     | 70                          | 38%                                 |
| B_lateralis       | Mudpit_v140310v02        | 54 kDa      | 100%                                      | 0.07%                                      | 27                                    | 39                                    | 69                          | 66%                                 |
| B_lateralis       | Mudpit_v140310v02        | 91 kDa      | 100%                                      | 0.04%                                      | 21                                    | 26                                    | 40                          | 29%                                 |
| B_lateralis       | Mudpit_v140310v02        | 45 kDa      | 100%                                      | 0.07%                                      | 13                                    | 17                                    | 67                          | 38%                                 |
| B_lateralis       | Mudpit_v140310v02        | 49 kDa      | 100%                                      | 0.05%                                      | 15                                    | 22                                    | 48                          | 45%                                 |
| B_lateralis       | Mudpit_v140310v02        | 273 kDa     | 100%                                      | 0.03%                                      | 22                                    | 29                                    | 33                          | 13%                                 |
| B_lateralis       | Mudpit_v140310v02        | 39 kDa      | 100%                                      | 0.03%                                      | 3                                     | 4                                     | 29                          | 38%                                 |
| B_lateralis       | Mudpit_v140310v02        | 87 kDa      | 100%                                      | 0.03%                                      | 12                                    | 14                                    | 30                          | 19%                                 |
| B_lateralis       | Mudpit_v140310v02        | 55 kDa      | 100%                                      | 0.03%                                      | 14                                    | 18                                    | 33                          | 36%                                 |
| B_lateralis       | Mudpit_v140310v02        | 61 kDa      | 100%                                      | 0.06%                                      | 6                                     | 9                                     | 60                          | 24%                                 |
| B_lateralis       | Mudpit_v140310v02        | 62 kDa      | 100%                                      | 0.03%                                      | 3                                     | 3                                     | 32                          | 16%                                 |
| B_lateralis       | Mudpit_v140310v02        | 37 kDa      | 100%                                      | 0.05%                                      | 9                                     | 22                                    | 46                          | 43%                                 |
| B_lateralis       | Mudpit_v140310v02        | 66 kDa      | 100%                                      | 0.03%                                      | 2                                     | 2                                     | 26                          | 4%                                  |
| B_lateralis       | Mudpit_v140310v02        | 71 kDa      | 100%                                      | 0.01%                                      | 2                                     | 3                                     | 13                          | 3%                                  |
| B_lateralis       | Mudpit_v140310v02        | 63 kDa      | 100%                                      | 0.01%                                      | 1                                     | 2                                     | 11                          | 2%                                  |
| B_lateralis       | Mudpit_v140310v02        | 62 kDa      | 100%                                      | 0.01%                                      | 1                                     | 1                                     | 9                           | 4%                                  |
| B_lateralis       | Mudpit_v140310v02        | 60 kDa      | 96%                                       | 0.00%                                      | 0                                     | 0                                     | 5                           | 4%                                  |
| B_lateralis       | Mudpit_v140310v02        | 60 kDa      | 73%                                       | 0.00%                                      | 0                                     | 0                                     | 5                           | 4%                                  |
| B_lateralis       | Mudpit_v140310v02        | 36 kDa      | 100%                                      | 0.07%                                      | 12                                    | 19                                    | 68                          | 36%                                 |
| B_lateralis       | Mudpit_v140310v02        | 12 kDa      | 100%                                      | 0.03%                                      | 5                                     | 10                                    | 32                          | 74%                                 |
| B_lateralis       | Mudpit_v140310v02        | 16 kDa      | 100%                                      | 0.03%                                      | 5                                     | 7                                     | 34                          | 47%                                 |
| B_lateralis       | Mudpit_v140310v02        | 39 kDa      | 100%                                      | 0.02%                                      | 9                                     | 15                                    | 23                          | 28%                                 |
| B_lateralis       | Mudpit_v140310v02        | 36 kDa      | 100%                                      | 0.03%                                      | 2                                     | 2                                     | 30                          | 34%                                 |
| B_lateralis       | Mudpit_v140310v02        | 141 kDa     | 100%                                      | 0.02%                                      | 11                                    | 13                                    | 21                          | 14%                                 |
| B_lateralis       | Mudpit_v140310v02        | 193 kDa     | 100%                                      | 0.03%                                      | 17                                    | 17                                    | 26                          | 15%                                 |
| B_lateralis       | Mudpit_v140310v02        | 42 kDa      | 100%                                      | 0.05%                                      | 5                                     | 6                                     | 48                          | 38%                                 |
| B_lateralis       | Mudpit_v140310v02        | 42 kDa      | 97%                                       | 0.04%                                      | 0                                     | 0                                     | 44                          | 25%                                 |
| B_lateralis       | Mudpit_v140310v02        | 42 kDa      | 95%                                       | 0.04%                                      | 0                                     | 0                                     | 44                          | 25%                                 |
| B_lateralis       | Mudpit_v140310v02        | 86 kDa      | 100%                                      | 0.03%                                      | 12                                    | 14                                    | 32                          | 25%                                 |
| B_lateralis       | Mudpit_v140310v02        | 47 kDa      | 100%                                      | 0.02%                                      | 6                                     | 7                                     | 17                          | 19%                                 |

| <b>Bio Sample</b> | <b>MS/MS Sample name</b> | <b>M.W.</b> | <b>Protein identification probability</b> | <b>Protein percentage of total spectra</b> | <b>Exclusive unique peptide count</b> | <b>Exclusive unique peptide count</b> | <b>Total spectrum count</b> | <b>Percentage sequence coverage</b> |
|-------------------|--------------------------|-------------|-------------------------------------------|--------------------------------------------|---------------------------------------|---------------------------------------|-----------------------------|-------------------------------------|
| B_lateralis       | Mudpit_v140310v02        | 47 kDa      | 8%                                        | 0.01%                                      | 0                                     | 0                                     | 6                           | 7%                                  |
| B_lateralis       | Mudpit_v140310v02        | 29 kDa      | 100%                                      | 0.04%                                      | 10                                    | 17                                    | 43                          | 59%                                 |
| B_lateralis       | Mudpit_v140310v02        | 57 kDa      | 100%                                      | 0.01%                                      | 8                                     | 8                                     | 14                          | 21%                                 |
| B_lateralis       | Mudpit_v140310v02        | 340 kDa     | 100%                                      | 0.00%                                      | 0                                     | 0                                     | 0                           | 0%                                  |
| B_lateralis       | Mudpit_v140310v02        | 142 kDa     | 100%                                      | 0.01%                                      | 0                                     | 0                                     | 14                          | 6%                                  |
| B_lateralis       | Mudpit_v140310v02        | 80 kDa      | 100%                                      | 0.01%                                      | 0                                     | 0                                     | 10                          | 9%                                  |
| B_lateralis       | Mudpit_v140310v02        | 40 kDa      | 100%                                      | 0.02%                                      | 7                                     | 7                                     | 16                          | 26%                                 |
| B_lateralis       | Mudpit_v140310v02        | 50 kDa      | 100%                                      | 0.03%                                      | 3                                     | 3                                     | 30                          | 13%                                 |
| B_lateralis       | Mudpit_v140310v02        | 48 kDa      | 100%                                      | 0.02%                                      | 2                                     | 2                                     | 16                          | 11%                                 |
| B_lateralis       | Mudpit_v140310v02        | 52 kDa      | 100%                                      | 0.02%                                      | 1                                     | 1                                     | 19                          | 8%                                  |
| B_lateralis       | Mudpit_v140310v02        | 48 kDa      | 96%                                       | 0.01%                                      | 0                                     | 0                                     | 10                          | 8%                                  |
| B_lateralis       | Mudpit_v140310v02        | 52 kDa      | 100%                                      | 0.03%                                      | 9                                     | 10                                    | 27                          | 23%                                 |
| B_lateralis       | Mudpit_v140310v02        | 106 kDa     | 100%                                      | 0.01%                                      | 7                                     | 7                                     | 15                          | 8%                                  |
| B_lateralis       | Mudpit_v140310v02        | 22 kDa      | 100%                                      | 0.02%                                      | 7                                     | 7                                     | 19                          | 36%                                 |
| B_lateralis       | Mudpit_v140310v02        | 11 kDa      | 100%                                      | 0.01%                                      | 1                                     | 1                                     | 6                           | 10%                                 |
| B_lateralis       | Mudpit_v140310v02        | 70 kDa      | 100%                                      | 0.02%                                      | 10                                    | 12                                    | 21                          | 20%                                 |
| B_lateralis       | Mudpit_v140310v02        | 105 kDa     | 100%                                      | 0.01%                                      | 11                                    | 11                                    | 15                          | 13%                                 |
| B_lateralis       | Mudpit_v140310v02        | 43 kDa      | 100%                                      | 0.01%                                      | 5                                     | 6                                     | 15                          | 17%                                 |
| B_lateralis       | Mudpit_v140310v02        | 77 kDa      | 100%                                      | 0.02%                                      | 8                                     | 10                                    | 19                          | 14%                                 |
| B_lateralis       | Mudpit_v140310v02        | 71 kDa      | 100%                                      | 0.01%                                      | 6                                     | 6                                     | 11                          | 12%                                 |
| B_lateralis       | Mudpit_v140310v02        | 97 kDa      | 100%                                      | 0.00%                                      | 0                                     | 0                                     | 1                           | 1%                                  |
| B_lateralis       | Mudpit_v140310v02        | 29 kDa      | 100%                                      | 0.01%                                      | 5                                     | 6                                     | 9                           | 26%                                 |
| B_lateralis       | Mudpit_v140310v02        | 67 kDa      | 100%                                      | 0.00%                                      | 4                                     | 4                                     | 4                           | 8%                                  |
| B_lateralis       | Mudpit_v140310v02        | 44 kDa      | 100%                                      | 0.02%                                      | 5                                     | 9                                     | 23                          | 20%                                 |
| B_lateralis       | Mudpit_v140310v02        | 12 kDa      | 100%                                      | 0.02%                                      | 6                                     | 6                                     | 18                          | 65%                                 |
| B_lateralis       | Mudpit_v140310v02        | 93 kDa      | 100%                                      | 0.01%                                      | 5                                     | 5                                     | 9                           | 6%                                  |
| B_lateralis       | Mudpit_v140310v02        | 70 kDa      | 100%                                      | 0.00%                                      | 1                                     | 2                                     | 5                           | 9%                                  |
| B_lateralis       | Mudpit_v140310v02        | 32 kDa      | 100%                                      | 0.02%                                      | 2                                     | 2                                     | 21                          | 31%                                 |
| B_lateralis       | Mudpit_v140310v02        | 37 kDa      | 100%                                      | 0.01%                                      | 5                                     | 7                                     | 11                          | 26%                                 |
| B_lateralis       | Mudpit_v140310v02        | 40 kDa      | 71%                                       | 0.00%                                      | 0                                     | 0                                     | 4                           | 13%                                 |

| <b>Bio Sample</b> | <b>MS/MS Sample name</b> | <b>M.W.</b> | <b>Protein identification probability</b> | <b>Protein percentage of total spectra</b> | <b>Exclusive unique peptide count</b> | <b>Exclusive unique peptide count</b> | <b>Total spectrum count</b> | <b>Percentage sequence coverage</b> |
|-------------------|--------------------------|-------------|-------------------------------------------|--------------------------------------------|---------------------------------------|---------------------------------------|-----------------------------|-------------------------------------|
| B_lateralis       | Mudpit_v140310v02        | 45 kDa      | 100%                                      | 0.01%                                      | 3                                     | 5                                     | 7                           | 14%                                 |
| B_lateralis       | Mudpit_v140310v02        | 58 kDa      | 100%                                      | 0.01%                                      | 6                                     | 6                                     | 7                           | 17%                                 |
| B_lateralis       | Mudpit_v140310v02        | 56 kDa      | 100%                                      | 0.00%                                      | 1                                     | 1                                     | 4                           | 9%                                  |
| B_lateralis       | Mudpit_v140310v02        | 53 kDa      | 69%                                       | 0.00%                                      | 0                                     | 0                                     | 3                           | 4%                                  |
| B_lateralis       | Mudpit_v140310v02        | 504 kDa     | 100%                                      | 0.00%                                      | 1                                     | 1                                     | 1                           | 0%                                  |
| B_lateralis       | Mudpit_v140310v02        | 55 kDa      | 100%                                      | 0.01%                                      | 5                                     | 5                                     | 9                           | 14%                                 |
| B_lateralis       | Mudpit_v140310v02        | 51 kDa      | 87%                                       | 0.00%                                      | 0                                     | 0                                     | 5                           | 2%                                  |
| B_lateralis       | Mudpit_v140310v02        | 47 kDa      | 53%                                       | 0.00%                                      | 0                                     | 0                                     | 5                           | 2%                                  |
| B_lateralis       | Mudpit_v140310v02        | 46 kDa      | 97%                                       | 0.00%                                      | 0                                     | 0                                     | 5                           | 2%                                  |
| B_lateralis       | Mudpit_v140310v02        | 46 kDa      | 73%                                       | 0.00%                                      | 0                                     | 0                                     | 0                           | 0%                                  |
| B_lateralis       | Mudpit_v140310v02        | 39 kDa      | 100%                                      | 0.01%                                      | 3                                     | 4                                     | 9                           | 9%                                  |
| B_lateralis       | Mudpit_v140310v02        | 50 kDa      | 100%                                      | 0.01%                                      | 4                                     | 4                                     | 6                           | 11%                                 |
| B_lateralis       | Mudpit_v140310v02        | 29 kDa      | 100%                                      | 0.01%                                      | 4                                     | 4                                     | 11                          | 29%                                 |
| B_lateralis       | Mudpit_v140310v02        | 29 kDa      | 64%                                       | 0.00%                                      | 0                                     | 0                                     | 3                           | 13%                                 |
| B_lateralis       | Mudpit_v140310v02        | 69 kDa      | 100%                                      | 0.01%                                      | 3                                     | 3                                     | 13                          | 11%                                 |
| B_lateralis       | Mudpit_v140310v02        | 469 kDa     | 100%                                      | 0.00%                                      | 1                                     | 1                                     | 3                           | 1%                                  |
| B_lateralis       | Mudpit_v140310v02        | 56 kDa      | 100%                                      | 0.01%                                      | 6                                     | 7                                     | 11                          | 16%                                 |
| B_lateralis       | Mudpit_v140310v02        | 102 kDa     | 100%                                      | 0.01%                                      | 7                                     | 8                                     | 9                           | 13%                                 |
| B_lateralis       | Mudpit_v140310v02        | 81 kDa      | 100%                                      | 0.01%                                      | 5                                     | 5                                     | 10                          | 7%                                  |
| B_lateralis       | Mudpit_v140310v02        | 55 kDa      | 100%                                      | 0.00%                                      | 3                                     | 3                                     | 5                           | 10%                                 |
| B_lateralis       | Mudpit_v140310v02        | 26 kDa      | 100%                                      | 0.01%                                      | 4                                     | 5                                     | 8                           | 22%                                 |
| B_lateralis       | Mudpit_v140310v02        | 272 kDa     | 100%                                      | 0.00%                                      | 2                                     | 3                                     | 4                           | 1%                                  |
| B_lateralis       | Mudpit_v140310v02        | 40 kDa      | 100%                                      | 0.00%                                      | 5                                     | 5                                     | 5                           | 17%                                 |
| B_lateralis       | Mudpit_v140310v02        | 66 kDa      | 100%                                      | 0.01%                                      | 3                                     | 3                                     | 13                          | 6%                                  |
| B_lateralis       | Mudpit_v140310v02        | 135 kDa     | 100%                                      | 0.00%                                      | 4                                     | 4                                     | 5                           | 4%                                  |
| B_lateralis       | Mudpit_v140310v02        | 59 kDa      | 100%                                      | 0.01%                                      | 3                                     | 3                                     | 7                           | 6%                                  |
| B_lateralis       | Mudpit_v140310v02        | 89 kDa      | 100%                                      | 0.01%                                      | 4                                     | 4                                     | 14                          | 7%                                  |
| B_lateralis       | Mudpit_v140310v02        | 16 kDa      | 100%                                      | 0.01%                                      | 5                                     | 5                                     | 8                           | 36%                                 |
| B_lateralis       | Mudpit_v140310v02        | 38 kDa      | 100%                                      | 0.01%                                      | 3                                     | 3                                     | 7                           | 9%                                  |
| B_lateralis       | Mudpit_v140310v02        | 95 kDa      | 100%                                      | 0.01%                                      | 4                                     | 4                                     | 6                           | 7%                                  |

| <b>Bio Sample</b> | <b>MS/MS Sample name</b> | <b>M.W.</b> | <b>Protein identification probability</b> | <b>Protein percentage of total spectra</b> | <b>Exclusive unique peptide count</b> | <b>Exclusive unique peptide count</b> | <b>Total spectrum count</b> | <b>Percentage sequence coverage</b> |
|-------------------|--------------------------|-------------|-------------------------------------------|--------------------------------------------|---------------------------------------|---------------------------------------|-----------------------------|-------------------------------------|
| B_lateralis       | Mudpit_v140310v02        | 44 kDa      | 100%                                      | 0.00%                                      | 0                                     | 0                                     | 0                           | 0%                                  |
| B_lateralis       | Mudpit_v140310v02        | 52 kDa      | 100%                                      | 0.01%                                      | 7                                     | 8                                     | 9                           | 20%                                 |
| B_lateralis       | Mudpit_v140310v02        | 15 kDa      | 100%                                      | 0.00%                                      | 1                                     | 1                                     | 4                           | 14%                                 |
| B_lateralis       | Mudpit_v140310v02        | 30 kDa      | 100%                                      | 0.01%                                      | 3                                     | 4                                     | 10                          | 25%                                 |
| B_lateralis       | Mudpit_v140310v02        | 17 kDa      | 95%                                       | 0.01%                                      | 0                                     | 0                                     | 6                           | 18%                                 |
| B_lateralis       | Mudpit_v140310v02        | 43 kDa      | 100%                                      | 0.00%                                      | 4                                     | 4                                     | 4                           | 20%                                 |
| B_lateralis       | Mudpit_v140310v02        | 50 kDa      | 100%                                      | 0.01%                                      | 2                                     | 3                                     | 13                          | 12%                                 |
| B_lateralis       | Mudpit_v140310v02        | 47 kDa      | 100%                                      | 0.01%                                      | 5                                     | 5                                     | 14                          | 20%                                 |
| B_lateralis       | Mudpit_v140310v02        | 28 kDa      | 100%                                      | 0.01%                                      | 5                                     | 6                                     | 7                           | 31%                                 |
| B_lateralis       | Mudpit_v140310v02        | 83 kDa      | 95%                                       | 0.01%                                      | 0                                     | 0                                     | 6                           | 5%                                  |
| B_lateralis       | Mudpit_v140310v02        | 18 kDa      | 97%                                       | 0.01%                                      | 0                                     | 0                                     | 6                           | 24%                                 |
| B_lateralis       | Mudpit_v140310v02        | 50 kDa      | 100%                                      | 0.01%                                      | 1                                     | 2                                     | 7                           | 16%                                 |
| B_lateralis       | Mudpit_v140310v02        | 50 kDa      | 74%                                       | 0.00%                                      | 0                                     | 0                                     | 4                           | 10%                                 |
| B_lateralis       | Mudpit_v140310v02        | 22 kDa      | 100%                                      | 0.01%                                      | 7                                     | 8                                     | 8                           | 49%                                 |
| B_lateralis       | Mudpit_v140310v02        | 60 kDa      | 100%                                      | 0.00%                                      | 2                                     | 2                                     | 3                           | 3%                                  |
| B_lateralis       | Mudpit_v140310v02        | 50 kDa      | 100%                                      | 0.02%                                      | 2                                     | 2                                     | 16                          | 36%                                 |
| B_lateralis       | Mudpit_v140310v02        | 50 kDa      | 100%                                      | 0.01%                                      | 1                                     | 1                                     | 14                          | 29%                                 |
| B_lateralis       | Mudpit_v140310v02        | 138 kDa     | 100%                                      | 0.00%                                      | 3                                     | 3                                     | 4                           | 4%                                  |
| B_lateralis       | Mudpit_v140310v02        | 83 kDa      | 100%                                      | 0.01%                                      | 6                                     | 6                                     | 10                          | 11%                                 |
| B_lateralis       | Mudpit_v140310v02        | 52 kDa      | 100%                                      | 0.01%                                      | 2                                     | 3                                     | 6                           | 6%                                  |
| B_lateralis       | Mudpit_v140310v02        | 99 kDa      | 100%                                      | 0.00%                                      | 3                                     | 3                                     | 3                           | 4%                                  |
| B_lateralis       | Mudpit_v140310v02        | 18 kDa      | 100%                                      | 0.01%                                      | 5                                     | 5                                     | 6                           | 21%                                 |
| B_lateralis       | Mudpit_v140310v02        | 354 kDa     | 100%                                      | 0.00%                                      | 1                                     | 1                                     | 1                           | 0%                                  |
| B_lateralis       | Mudpit_v140310v02        | 28 kDa      | 100%                                      | 0.01%                                      | 3                                     | 5                                     | 7                           | 19%                                 |
| B_lateralis       | Mudpit_v140310v02        | 60 kDa      | 100%                                      | 0.01%                                      | 3                                     | 3                                     | 6                           | 7%                                  |
| B_lateralis       | Mudpit_v140310v02        | 28 kDa      | 100%                                      | 0.00%                                      | 1                                     | 1                                     | 3                           | 8%                                  |
| B_lateralis       | Mudpit_v140310v02        | 28 kDa      | 100%                                      | 0.00%                                      | 2                                     | 2                                     | 4                           | 13%                                 |
| B_lateralis       | Mudpit_v140310v02        | 32 kDa      | 99%                                       | 0.00%                                      | 1                                     | 1                                     | 3                           | 8%                                  |
| B_lateralis       | Mudpit_v140310v02        | 24 kDa      | 100%                                      | 0.00%                                      | 0                                     | 0                                     | 0                           | 0%                                  |
| B_lateralis       | Mudpit_v140310v02        | 24 kDa      | 6%                                        | 0.00%                                      | 0                                     | 0                                     | 0                           | 0%                                  |

| <b>Bio Sample</b> | <b>MS/MS Sample name</b> | <b>M.W.</b> | <b>Protein identification probability</b> | <b>Protein percentage of total spectra</b> | <b>Exclusive unique peptide count</b> | <b>Exclusive unique peptide count</b> | <b>Total spectrum count</b> | <b>Percentage sequence coverage</b> |
|-------------------|--------------------------|-------------|-------------------------------------------|--------------------------------------------|---------------------------------------|---------------------------------------|-----------------------------|-------------------------------------|
| B_lateralis       | Mudpit_v140310v02        | 30 kDa      | 100%                                      | 0.00%                                      | 2                                     | 2                                     | 5                           | 19%                                 |
| B_lateralis       | Mudpit_v140310v02        | 61 kDa      | 100%                                      | 0.00%                                      | 4                                     | 4                                     | 5                           | 11%                                 |
| B_lateralis       | Mudpit_v140310v02        | 22 kDa      | 100%                                      | 0.01%                                      | 4                                     | 6                                     | 10                          | 28%                                 |
| B_lateralis       | Mudpit_v140310v02        | 23 kDa      | 100%                                      | 0.01%                                      | 6                                     | 7                                     | 7                           | 28%                                 |
| B_lateralis       | Mudpit_v140310v02        | 26 kDa      | 100%                                      | 0.00%                                      | 2                                     | 2                                     | 4                           | 10%                                 |
| B_lateralis       | Mudpit_v140310v02        | 61 kDa      | 100%                                      | 0.00%                                      | 3                                     | 3                                     | 5                           | 7%                                  |
| B_lateralis       | Mudpit_v140310v02        | 193 kDa     | 100%                                      | 0.00%                                      | 3                                     | 3                                     | 3                           | 2%                                  |
| B_lateralis       | Mudpit_v140310v02        | 36 kDa      | 100%                                      | 0.00%                                      | 3                                     | 3                                     | 4                           | 10%                                 |
| B_lateralis       | Mudpit_v140310v02        | 23 kDa      | 100%                                      | 0.00%                                      | 1                                     | 1                                     | 1                           | 3%                                  |
| B_lateralis       | Mudpit_v140310v02        | 39 kDa      | 100%                                      | 0.00%                                      | 3                                     | 4                                     | 4                           | 10%                                 |
| B_lateralis       | Mudpit_v140310v02        | 50 kDa      | 100%                                      | 0.01%                                      | 2                                     | 3                                     | 9                           | 8%                                  |
| B_lateralis       | Mudpit_v140310v02        | 22 kDa      | 100%                                      | 0.00%                                      | 2                                     | 2                                     | 3                           | 11%                                 |
| B_lateralis       | Mudpit_v140310v02        | 25 kDa      | 100%                                      | 0.00%                                      | 1                                     | 1                                     | 3                           | 12%                                 |
| B_lateralis       | Mudpit_v140310v02        | 55 kDa      | 100%                                      | 0.00%                                      | 2                                     | 2                                     | 2                           | 4%                                  |
| B_lateralis       | Mudpit_v140310v02        | 35 kDa      | 100%                                      | 0.00%                                      | 2                                     | 2                                     | 3                           | 8%                                  |
| B_lateralis       | Mudpit_v140310v02        | 106 kDa     | 100%                                      | 0.00%                                      | 0                                     | 0                                     | 0                           | 0%                                  |
| B_lateralis       | Mudpit_v140310v02        | 25 kDa      | 100%                                      | 0.00%                                      | 1                                     | 1                                     | 2                           | 14%                                 |
| B_lateralis       | Mudpit_v140310v02        | 50 kDa      | 100%                                      | 0.00%                                      | 2                                     | 3                                     | 3                           | 7%                                  |
| B_lateralis       | Mudpit_v140310v02        | 35 kDa      | 97%                                       | 0.00%                                      | 0                                     | 0                                     | 0                           | 0%                                  |
| B_lateralis       | Mudpit_v140310v02        | 68 kDa      | 100%                                      | 0.00%                                      | 2                                     | 2                                     | 2                           | 5%                                  |
| B_lateralis       | Mudpit_v140310v02        | 44 kDa      | 99%                                       | 0.00%                                      | 0                                     | 0                                     | 4                           | 8%                                  |
| B_lateralis       | Mudpit_v140310v02        | 39 kDa      | 100%                                      | 0.00%                                      | 1                                     | 1                                     | 1                           | 4%                                  |
| B_lateralis       | Mudpit_v140310v02        | 43 kDa      | 100%                                      | 0.00%                                      | 1                                     | 1                                     | 1                           | 6%                                  |
| B_lateralis       | Mudpit_v140310v02        | 13 kDa      | 100%                                      | 0.00%                                      | 0                                     | 0                                     | 0                           | 0%                                  |
| B_lateralis       | Mudpit_v140310v02        | 21 kDa      | 99%                                       | 0.00%                                      | 0                                     | 0                                     | 2                           | 12%                                 |
| B_lateralis       | Mudpit_v140310v02        | 83 kDa      | 100%                                      | 0.01%                                      | 4                                     | 4                                     | 6                           | 11%                                 |
| B_lateralis       | Mudpit_v140310v02        | 27 kDa      | 100%                                      | 0.00%                                      | 2                                     | 2                                     | 4                           | 8%                                  |
| B_lateralis       | Mudpit_v140310v02        | 22 kDa      | 100%                                      | 0.01%                                      | 3                                     | 3                                     | 6                           | 24%                                 |
| B_lateralis       | Mudpit_v140310v02        | 53 kDa      | 100%                                      | 0.00%                                      | 4                                     | 5                                     | 5                           | 12%                                 |
| B_lateralis       | Mudpit_v140310v02        | 23 kDa      | 99%                                       | 0.00%                                      | 0                                     | 0                                     | 4                           | 17%                                 |

| <b>Bio Sample</b> | <b>MS/MS Sample name</b> | <b>M.W.</b> | <b>Protein identification probability</b> | <b>Protein percentage of total spectra</b> | <b>Exclusive unique peptide count</b> | <b>Exclusive unique peptide count</b> | <b>Total spectrum count</b> | <b>Percentage sequence coverage</b> |
|-------------------|--------------------------|-------------|-------------------------------------------|--------------------------------------------|---------------------------------------|---------------------------------------|-----------------------------|-------------------------------------|
| B_lateralis       | Mudpit_v140310v02        | 26 kDa      | 90%                                       | 0.00%                                      | 0                                     | 0                                     | 4                           | 15%                                 |
| B_lateralis       | Mudpit_v140310v02        | 15 kDa      | 100%                                      | 0.00%                                      | 1                                     | 1                                     | 1                           | 9%                                  |
| B_lateralis       | Mudpit_v140310v02        | 137 kDa     | 100%                                      | 0.00%                                      | 2                                     | 2                                     | 2                           | 2%                                  |
| B_lateralis       | Mudpit_v140310v02        | 21 kDa      | 100%                                      | 0.00%                                      | 3                                     | 3                                     | 3                           | 19%                                 |
| B_lateralis       | Mudpit_v140310v02        | 21 kDa      | 100%                                      | 0.00%                                      | 1                                     | 1                                     | 1                           | 8%                                  |
| B_lateralis       | Mudpit_v140310v02        | 24 kDa      | 100%                                      | 0.00%                                      | 3                                     | 3                                     | 4                           | 20%                                 |
| B_lateralis       | Mudpit_v140310v02        | 21 kDa      | 100%                                      | 0.01%                                      | 3                                     | 3                                     | 6                           | 25%                                 |
| B_lateralis       | Mudpit_v140310v02        | 50 kDa      | 100%                                      | 0.00%                                      | 3                                     | 3                                     | 3                           | 8%                                  |
| B_lateralis       | Mudpit_v140310v02        | 46 kDa      | 100%                                      | 0.00%                                      | 0                                     | 0                                     | 2                           | 2%                                  |
| B_lateralis       | Mudpit_v140310v02        | 139 kDa     | 100%                                      | 0.00%                                      | 1                                     | 1                                     | 1                           | 1%                                  |
| B_lateralis       | Mudpit_v140310v02        | 29 kDa      | 100%                                      | 0.00%                                      | 2                                     | 2                                     | 2                           | 9%                                  |
| B_lateralis       | Mudpit_v140310v02        | 37 kDa      | 100%                                      | 0.00%                                      | 2                                     | 2                                     | 3                           | 8%                                  |
| B_lateralis       | Mudpit_v140310v02        | 138 kDa     | 100%                                      | 0.00%                                      | 0                                     | 0                                     | 0                           | 0%                                  |
| B_lateralis       | Mudpit_v140310v02        | 26 kDa      | 100%                                      | 0.00%                                      | 3                                     | 3                                     | 3                           | 18%                                 |
| B_lateralis       | Mudpit_v140310v02        | 112 kDa     | 99%                                       | 0.00%                                      | 1                                     | 1                                     | 4                           | 1%                                  |
| B_lateralis       | Mudpit_v140310v02        | 24 kDa      | 100%                                      | 0.00%                                      | 3                                     | 3                                     | 4                           | 20%                                 |
| B_lateralis       | Mudpit_v140310v02        | 37 kDa      | 100%                                      | 0.00%                                      | 4                                     | 4                                     | 4                           | 14%                                 |
| B_lateralis       | Mudpit_v140310v02        | 45 kDa      | 100%                                      | 0.00%                                      | 0                                     | 0                                     | 0                           | 0%                                  |
| B_lateralis       | Mudpit_v140310v02        | 23 kDa      | 100%                                      | 0.00%                                      | 2                                     | 2                                     | 3                           | 15%                                 |
| B_lateralis       | Mudpit_v140310v02        | 48 kDa      | 97%                                       | 0.00%                                      | 1                                     | 1                                     | 1                           | 3%                                  |
| B_lateralis       | Mudpit_v140310v02        | 51 kDa      | 100%                                      | 0.00%                                      | 3                                     | 3                                     | 4                           | 7%                                  |
| B_lateralis       | Mudpit_v140310v02        | 32 kDa      | 100%                                      | 0.00%                                      | 2                                     | 2                                     | 2                           | 11%                                 |
| B_lateralis       | Mudpit_v140310v02        | 52 kDa      | 100%                                      | 0.00%                                      | 2                                     | 2                                     | 2                           | 4%                                  |
| B_lateralis       | Mudpit_v140310v02        | 53 kDa      | 100%                                      | 0.00%                                      | 1                                     | 1                                     | 4                           | 6%                                  |
| B_lateralis       | Mudpit_v140310v02        | 17 kDa      | 100%                                      | 0.00%                                      | 1                                     | 1                                     | 4                           | 21%                                 |
| B_lateralis       | Mudpit_v140310v02        | 19 kDa      | 98%                                       | 0.00%                                      | 0                                     | 0                                     | 2                           | 11%                                 |
| B_lateralis       | Mudpit_v140310v02        | 20 kDa      | 100%                                      | 0.00%                                      | 1                                     | 1                                     | 3                           | 30%                                 |
| B_lateralis       | Mudpit_v140310v02        | 46 kDa      | 100%                                      | 0.00%                                      | 3                                     | 3                                     | 3                           | 12%                                 |
| B_lateralis       | Mudpit_v140310v02        | 101 kDa     | 100%                                      | 0.00%                                      | 2                                     | 2                                     | 4                           | 3%                                  |
| B_lateralis       | Mudpit_v140310v02        | 22 kDa      | 98%                                       | 0.00%                                      | 1                                     | 1                                     | 2                           | 6%                                  |

| <b>Bio Sample</b> | <b>MS/MS Sample name</b> | <b>M.W.</b> | <b>Protein identification probability</b> | <b>Protein percentage of total spectra</b> | <b>Exclusive unique peptide count</b> | <b>Exclusive unique peptide count</b> | <b>Total spectrum count</b> | <b>Percentage sequence coverage</b> |
|-------------------|--------------------------|-------------|-------------------------------------------|--------------------------------------------|---------------------------------------|---------------------------------------|-----------------------------|-------------------------------------|
| B_lateralis       | Mudpit_v140310v02        | 17 kDa      | 96%                                       | 0.00%                                      | 1                                     | 1                                     | 1                           | 10%                                 |
| B_lateralis       | Mudpit_v140310v02        | 209 kDa     | 6%                                        | 0.00%                                      | 0                                     | 0                                     | 0                           | 0%                                  |
| B_lateralis       | Mudpit_v140310v02        | 192 kDa     | 100%                                      | 0.00%                                      | 2                                     | 2                                     | 3                           | 1%                                  |
| B_lateralis       | Mudpit_v140310v02        | 12 kDa      | 100%                                      | 0.00%                                      | 1                                     | 1                                     | 1                           | 17%                                 |
| B_lateralis       | Mudpit_v140310v02        | 19 kDa      | 100%                                      | 0.00%                                      | 1                                     | 1                                     | 2                           | 15%                                 |
| B_lateralis       | Mudpit_v140310v02        | 19 kDa      | 98%                                       | 0.00%                                      | 1                                     | 1                                     | 2                           | 19%                                 |
| B_lateralis       | Mudpit_v140310v02        | 48 kDa      | 100%                                      | 0.00%                                      | 2                                     | 2                                     | 2                           | 6%                                  |
| B_lateralis       | Mudpit_v140310v02        | 62 kDa      | 100%                                      | 0.00%                                      | 1                                     | 1                                     | 2                           | 5%                                  |
| B_lateralis       | Mudpit_v140310v02        | 118 kDa     | 100%                                      | 0.00%                                      | 3                                     | 3                                     | 4                           | 4%                                  |
| B_lateralis       | Mudpit_v140310v02        | 130 kDa     | 20%                                       | 0.00%                                      | 0                                     | 0                                     | 0                           | 0%                                  |
| B_lateralis       | Mudpit_v140310v02        | 14 kDa      | 100%                                      | 0.00%                                      | 2                                     | 2                                     | 3                           | 20%                                 |
| B_lateralis       | Mudpit_v140310v02        | 46 kDa      | 99%                                       | 0.00%                                      | 0                                     | 0                                     | 0                           | 0%                                  |
| B_lateralis       | Mudpit_v140310v02        | 27 kDa      | 58%                                       | 0.00%                                      | 0                                     | 0                                     | 0                           | 0%                                  |
| B_lateralis       | Mudpit_v140310v02        | 26 kDa      | 100%                                      | 0.00%                                      | 1                                     | 2                                     | 2                           | 4%                                  |
| B_lateralis       | Mudpit_v140310v02        | 25 kDa      | 99%                                       | 0.00%                                      | 1                                     | 1                                     | 3                           | 5%                                  |
| B_lateralis       | Mudpit_v140310v02        | 25 kDa      | 100%                                      | 0.00%                                      | 1                                     | 1                                     | 1                           | 6%                                  |
| B_lateralis       | Mudpit_v140310v02        | 53 kDa      | 100%                                      | 0.00%                                      | 3                                     | 3                                     | 3                           | 8%                                  |
| B_lateralis       | Mudpit_v140310v02        | 44 kDa      | 62%                                       | 0.00%                                      | 1                                     | 1                                     | 1                           | 2%                                  |
| B_lateralis       | Mudpit_v140310v02        | 12 kDa      | 98%                                       | 0.00%                                      | 1                                     | 1                                     | 1                           | 12%                                 |
| B_lateralis       | Mudpit_v140310v02        | 86 kDa      | 42%                                       | 0.00%                                      | 0                                     | 0                                     | 0                           | 0%                                  |
| B_lateralis       | Mudpit_v140310v02        | 85 kDa      | 100%                                      | 0.00%                                      | 2                                     | 2                                     | 4                           | 7%                                  |
| B_lateralis       | Mudpit_v140310v02        | 50 kDa      | 100%                                      | 0.00%                                      | 2                                     | 2                                     | 2                           | 5%                                  |
| B_lateralis       | Mudpit_v140310v02        | 21 kDa      | 99%                                       | 0.00%                                      | 1                                     | 1                                     | 1                           | 7%                                  |
| B_lateralis       | Mudpit_v140310v02        | 37 kDa      | 100%                                      | 0.00%                                      | 1                                     | 1                                     | 1                           | 3%                                  |
| B_lateralis       | Mudpit_v140310v02        | 29 kDa      | 100%                                      | 0.00%                                      | 3                                     | 3                                     | 3                           | 14%                                 |
| B_lateralis       | Mudpit_v140310v02        | 34 kDa      | 100%                                      | 0.00%                                      | 2                                     | 3                                     | 3                           | 9%                                  |
| B_lateralis       | Mudpit_v140310v02        | 14 kDa      | 38%                                       | 0.00%                                      | 0                                     | 0                                     | 0                           | 0%                                  |
| B_lateralis       | Mudpit_v140310v02        | 71 kDa      | 100%                                      | 0.00%                                      | 1                                     | 1                                     | 3                           | 7%                                  |
| B_lateralis       | Mudpit_v140310v02        | 62 kDa      | 42%                                       | 0.00%                                      | 0                                     | 0                                     | 0                           | 0%                                  |
| B_lateralis       | Mudpit_v140310v02        | 24 kDa      | 100%                                      | 0.00%                                      | 0                                     | 0                                     | 0                           | 0%                                  |



| <b>Bio Sample</b> | <b>MS/MS Sample name</b> | <b>M.W.</b> | <b>Protein identification probability</b> | <b>Protein percentage of total spectra</b> | <b>Exclusive unique peptide count</b> | <b>Exclusive unique peptide count</b> | <b>Total spectrum count</b> | <b>Percentage sequence coverage</b> |
|-------------------|--------------------------|-------------|-------------------------------------------|--------------------------------------------|---------------------------------------|---------------------------------------|-----------------------------|-------------------------------------|
| B_lateralis       | Mudpit_v140310v02        | 37 kDa      | 98%                                       | 0.00%                                      | 0                                     | 0                                     | 4                           | 8%                                  |
| B_lateralis       | Mudpit_v140310v02        | 18 kDa      | 100%                                      | 0.00%                                      | 3                                     | 3                                     | 3                           | 18%                                 |
| B_lateralis       | Mudpit_v140310v02        | 14 kDa      | 100%                                      | 0.00%                                      | 2                                     | 2                                     | 2                           | 26%                                 |
| B_lateralis       | Mudpit_v140310v02        | 8 kDa       | 94%                                       | 0.00%                                      | 0                                     | 0                                     | 0                           | 0%                                  |
| B_lateralis       | Mudpit_v140310v02        | 23 kDa      | 100%                                      | 0.00%                                      | 2                                     | 2                                     | 2                           | 10%                                 |
| B_lateralis       | Mudpit_v140310v02        | 17 kDa      | 100%                                      | 0.00%                                      | 2                                     | 2                                     | 2                           | 14%                                 |
| B_lateralis       | Mudpit_v140310v02        | 23 kDa      | 100%                                      | 0.00%                                      | 1                                     | 1                                     | 2                           | 10%                                 |
| B_lateralis       | Mudpit_v140310v02        | 22 kDa      | 100%                                      | 0.00%                                      | 2                                     | 2                                     | 2                           | 12%                                 |
| B_lateralis       | Mudpit_v140310v02        | 22 kDa      | 100%                                      | 0.00%                                      | 3                                     | 3                                     | 3                           | 18%                                 |
| B_lateralis       | Mudpit_v140310v02        | 23 kDa      | 100%                                      | 0.00%                                      | 2                                     | 2                                     | 2                           | 12%                                 |
| B_lateralis       | Mudpit_v140310v02        | 21 kDa      | 100%                                      | 0.00%                                      | 1                                     | 1                                     | 2                           | 11%                                 |
| C_simus           | Mudpit_v140312v05        | 69 kDa      | 100%                                      | 1.51%                                      | 55                                    | 178                                   | 1529                        | 80%                                 |
| C_simus           | Mudpit_v140312v05        | 77 kDa      | 100%                                      | 0.52%                                      | 2                                     | 5                                     | 528                         | 69%                                 |
| C_simus           | Mudpit_v140312v05        | 108 kDa     | 100%                                      | 0.50%                                      | 0                                     | 0                                     | 507                         | 46%                                 |
| C_simus           | Mudpit_v140312v05        | 186 kDa     | 100%                                      | 0.33%                                      | 61                                    | 92                                    | 333                         | 47%                                 |
| C_simus           | Mudpit_v140312v05        | 16 kDa      | 100%                                      | 0.16%                                      | 7                                     | 16                                    | 164                         | 86%                                 |
| C_simus           | Mudpit_v140312v05        | 16 kDa      | 100%                                      | 0.23%                                      | 5                                     | 8                                     | 231                         | 90%                                 |
| C_simus           | Mudpit_v140312v05        | 16 kDa      | 100%                                      | 0.27%                                      | 2                                     | 7                                     | 268                         | 90%                                 |
| C_simus           | Mudpit_v140312v05        | 16 kDa      | 90%                                       | 0.01%                                      | 0                                     | 0                                     | 15                          | 7%                                  |
| C_simus           | Mudpit_v140312v05        | 167 kDa     | 100%                                      | 0.22%                                      | 1                                     | 2                                     | 224                         | 43%                                 |
| C_simus           | Mudpit_v140312v05        | 166 kDa     | 100%                                      | 0.22%                                      | 1                                     | 1                                     | 224                         | 44%                                 |
| C_simus           | Mudpit_v140312v05        | 31 kDa      | 100%                                      | 0.13%                                      | 20                                    | 36                                    | 132                         | 56%                                 |
| C_simus           | Mudpit_v140312v05        | 46 kDa      | 100%                                      | 0.11%                                      | 6                                     | 14                                    | 114                         | 50%                                 |
| C_simus           | Mudpit_v140312v05        | 46 kDa      | 100%                                      | 0.08%                                      | 4                                     | 7                                     | 81                          | 45%                                 |
| C_simus           | Mudpit_v140312v05        | 46 kDa      | 100%                                      | 0.08%                                      | 2                                     | 2                                     | 77                          | 45%                                 |
| C_simus           | Mudpit_v140312v05        | 47 kDa      | 100%                                      | 0.18%                                      | 17                                    | 31                                    | 186                         | 54%                                 |
| C_simus           | Mudpit_v140312v05        | 47 kDa      | 100%                                      | 0.04%                                      | 0                                     | 0                                     | 44                          | 17%                                 |
| C_simus           | Mudpit_v140312v05        | 47 kDa      | 34%                                       | 0.03%                                      | 0                                     | 0                                     | 28                          | 6%                                  |
| C_simus           | Mudpit_v140312v05        | 15 kDa      | 100%                                      | 0.19%                                      | 9                                     | 20                                    | 188                         | 75%                                 |
| C_simus           | Mudpit_v140312v05        | 165 kDa     | 100%                                      | 0.06%                                      | 19                                    | 25                                    | 65                          | 28%                                 |

| <b>Bio Sample</b> | <b>MS/MS Sample name</b> | <b>M.W.</b> | <b>Protein identification probability</b> | <b>Protein percentage of total spectra</b> | <b>Exclusive unique peptide count</b> | <b>Exclusive unique peptide count</b> | <b>Total spectrum count</b> | <b>Percentage sequence coverage</b> |
|-------------------|--------------------------|-------------|-------------------------------------------|--------------------------------------------|---------------------------------------|---------------------------------------|-----------------------------|-------------------------------------|
| C_simus           | Mudpit_v140312v05        | 162 kDa     | 100%                                      | 0.03%                                      | 2                                     | 2                                     | 28                          | 10%                                 |
| C_simus           | Mudpit_v140312v05        | 51 kDa      | 100%                                      | 0.10%                                      | 22                                    | 40                                    | 96                          | 48%                                 |
| C_simus           | Mudpit_v140312v05        | 43 kDa      | 100%                                      | 0.12%                                      | 17                                    | 28                                    | 118                         | 53%                                 |
| C_simus           | Mudpit_v140312v05        | 48 kDa      | 100%                                      | 0.11%                                      | 2                                     | 2                                     | 116                         | 46%                                 |
| C_simus           | Mudpit_v140312v05        | 53 kDa      | 100%                                      | 0.10%                                      | 0                                     | 0                                     | 97                          | 38%                                 |
| C_simus           | Mudpit_v140312v05        | 124 kDa     | 100%                                      | 0.08%                                      | 1                                     | 1                                     | 77                          | 40%                                 |
| C_simus           | Mudpit_v140312v05        | 124 kDa     | 100%                                      | 0.07%                                      | 1                                     | 1                                     | 72                          | 41%                                 |
| C_simus           | Mudpit_v140312v05        | 54 kDa      | 100%                                      | 0.08%                                      | 23                                    | 38                                    | 80                          | 68%                                 |
| C_simus           | Mudpit_v140312v05        | 91 kDa      | 100%                                      | 0.04%                                      | 23                                    | 24                                    | 42                          | 33%                                 |
| C_simus           | Mudpit_v140312v05        | 45 kDa      | 100%                                      | 0.06%                                      | 13                                    | 15                                    | 56                          | 43%                                 |
| C_simus           | Mudpit_v140312v05        | 49 kDa      | 100%                                      | 0.01%                                      | 3                                     | 3                                     | 6                           | 7%                                  |
| C_simus           | Mudpit_v140312v05        | 273 kDa     | 100%                                      | 0.05%                                      | 25                                    | 30                                    | 46                          | 15%                                 |
| C_simus           | Mudpit_v140312v05        | 39 kDa      | 100%                                      | 0.06%                                      | 3                                     | 7                                     | 59                          | 64%                                 |
| C_simus           | Mudpit_v140312v05        | 87 kDa      | 100%                                      | 0.02%                                      | 7                                     | 7                                     | 23                          | 12%                                 |
| C_simus           | Mudpit_v140312v05        | 55 kDa      | 100%                                      | 0.00%                                      | 3                                     | 3                                     | 3                           | 8%                                  |
| C_simus           | Mudpit_v140312v05        | 61 kDa      | 100%                                      | 0.05%                                      | 7                                     | 12                                    | 52                          | 27%                                 |
| C_simus           | Mudpit_v140312v05        | 62 kDa      | 100%                                      | 0.03%                                      | 2                                     | 2                                     | 27                          | 13%                                 |
| C_simus           | Mudpit_v140312v05        | 37 kDa      | 100%                                      | 0.04%                                      | 8                                     | 21                                    | 45                          | 41%                                 |
| C_simus           | Mudpit_v140312v05        | 66 kDa      | 100%                                      | 0.01%                                      | 1                                     | 1                                     | 9                           | 4%                                  |
| C_simus           | Mudpit_v140312v05        | 71 kDa      | 96%                                       | 0.00%                                      | 0                                     | 0                                     | 0                           | 0%                                  |
| C_simus           | Mudpit_v140312v05        | 63 kDa      | 95%                                       | 0.00%                                      | 1                                     | 1                                     | 1                           | 2%                                  |
| C_simus           | Mudpit_v140312v05        | 62 kDa      | 64%                                       | 0.00%                                      | 0                                     | 0                                     | 1                           | 2%                                  |
| C_simus           | Mudpit_v140312v05        | 60 kDa      | 83%                                       | 0.00%                                      | 0                                     | 0                                     | 1                           | 2%                                  |
| C_simus           | Mudpit_v140312v05        | 60 kDa      | 66%                                       | 0.00%                                      | 0                                     | 0                                     | 1                           | 2%                                  |
| C_simus           | Mudpit_v140312v05        | 36 kDa      | 100%                                      | 0.05%                                      | 12                                    | 17                                    | 55                          | 37%                                 |
| C_simus           | Mudpit_v140312v05        | 12 kDa      | 100%                                      | 0.06%                                      | 5                                     | 12                                    | 61                          | 48%                                 |
| C_simus           | Mudpit_v140312v05        | 16 kDa      | 100%                                      | 0.04%                                      | 7                                     | 10                                    | 44                          | 63%                                 |
| C_simus           | Mudpit_v140312v05        | 39 kDa      | 100%                                      | 0.02%                                      | 9                                     | 13                                    | 23                          | 28%                                 |
| C_simus           | Mudpit_v140312v05        | 36 kDa      | 100%                                      | 0.05%                                      | 3                                     | 5                                     | 47                          | 48%                                 |
| C_simus           | Mudpit_v140312v05        | 141 kDa     | 100%                                      | 0.02%                                      | 9                                     | 10                                    | 16                          | 11%                                 |

| <b>Bio Sample</b> | <b>MS/MS Sample name</b> | <b>M.W.</b> | <b>Protein identification probability</b> | <b>Protein percentage of total spectra</b> | <b>Exclusive unique peptide count</b> | <b>Exclusive unique peptide count</b> | <b>Total spectrum count</b> | <b>Percentage sequence coverage</b> |
|-------------------|--------------------------|-------------|-------------------------------------------|--------------------------------------------|---------------------------------------|---------------------------------------|-----------------------------|-------------------------------------|
| C_simus           | Mudpit_v140312v05        | 193 kDa     | 100%                                      | 0.02%                                      | 10                                    | 11                                    | 24                          | 8%                                  |
| C_simus           | Mudpit_v140312v05        | 42 kDa      | 100%                                      | 0.02%                                      | 3                                     | 3                                     | 20                          | 31%                                 |
| C_simus           | Mudpit_v140312v05        | 42 kDa      | 95%                                       | 0.02%                                      | 0                                     | 0                                     | 18                          | 21%                                 |
| C_simus           | Mudpit_v140312v05        | 42 kDa      | 85%                                       | 0.02%                                      | 0                                     | 0                                     | 18                          | 21%                                 |
| C_simus           | Mudpit_v140312v05        | 86 kDa      | 100%                                      | 0.02%                                      | 10                                    | 12                                    | 22                          | 19%                                 |
| C_simus           | Mudpit_v140312v05        | 47 kDa      | 100%                                      | 0.03%                                      | 9                                     | 10                                    | 29                          | 36%                                 |
| C_simus           | Mudpit_v140312v05        | 47 kDa      | 94%                                       | 0.01%                                      | 0                                     | 0                                     | 13                          | 6%                                  |
| C_simus           | Mudpit_v140312v05        | 29 kDa      | 100%                                      | 0.02%                                      | 9                                     | 16                                    | 25                          | 47%                                 |
| C_simus           | Mudpit_v140312v05        | 57 kDa      | 100%                                      | 0.04%                                      | 18                                    | 25                                    | 41                          | 43%                                 |
| C_simus           | Mudpit_v140312v05        | 340 kDa     | 100%                                      | 0.00%                                      | 0                                     | 0                                     | 0                           | 0%                                  |
| C_simus           | Mudpit_v140312v05        | 142 kDa     | 100%                                      | 0.01%                                      | 1                                     | 1                                     | 12                          | 6%                                  |
| C_simus           | Mudpit_v140312v05        | 80 kDa      | 97%                                       | 0.01%                                      | 0                                     | 0                                     | 7                           | 7%                                  |
| C_simus           | Mudpit_v140312v05        | 40 kDa      | 100%                                      | 0.03%                                      | 10                                    | 11                                    | 26                          | 33%                                 |
| C_simus           | Mudpit_v140312v05        | 50 kDa      | 100%                                      | 0.01%                                      | 2                                     | 2                                     | 14                          | 6%                                  |
| C_simus           | Mudpit_v140312v05        | 48 kDa      | 100%                                      | 0.00%                                      | 1                                     | 1                                     | 1                           | 3%                                  |
| C_simus           | Mudpit_v140312v05        | 52 kDa      | 99%                                       | 0.00%                                      | 0                                     | 0                                     | 5                           | 2%                                  |
| C_simus           | Mudpit_v140312v05        | 52 kDa      | 100%                                      | 0.02%                                      | 8                                     | 11                                    | 21                          | 24%                                 |
| C_simus           | Mudpit_v140312v05        | 106 kDa     | 100%                                      | 0.02%                                      | 7                                     | 7                                     | 22                          | 7%                                  |
| C_simus           | Mudpit_v140312v05        | 22 kDa      | 100%                                      | 0.02%                                      | 7                                     | 9                                     | 17                          | 36%                                 |
| C_simus           | Mudpit_v140312v05        | 11 kDa      | 100%                                      | 0.04%                                      | 2                                     | 3                                     | 39                          | 19%                                 |
| C_simus           | Mudpit_v140312v05        | 70 kDa      | 100%                                      | 0.02%                                      | 10                                    | 13                                    | 22                          | 19%                                 |
| C_simus           | Mudpit_v140312v05        | 105 kDa     | 100%                                      | 0.02%                                      | 13                                    | 15                                    | 21                          | 14%                                 |
| C_simus           | Mudpit_v140312v05        | 43 kDa      | 100%                                      | 0.01%                                      | 6                                     | 6                                     | 15                          | 23%                                 |
| C_simus           | Mudpit_v140312v05        | 77 kDa      | 100%                                      | 0.03%                                      | 10                                    | 11                                    | 29                          | 18%                                 |
| C_simus           | Mudpit_v140312v05        | 71 kDa      | 100%                                      | 0.01%                                      | 7                                     | 7                                     | 10                          | 13%                                 |
| C_simus           | Mudpit_v140312v05        | 97 kDa      | 100%                                      | 0.01%                                      | 4                                     | 4                                     | 9                           | 10%                                 |
| C_simus           | Mudpit_v140312v05        | 29 kDa      | 100%                                      | 0.02%                                      | 8                                     | 10                                    | 22                          | 44%                                 |
| C_simus           | Mudpit_v140312v05        | 67 kDa      | 100%                                      | 0.00%                                      | 3                                     | 3                                     | 4                           | 6%                                  |
| C_simus           | Mudpit_v140312v05        | 44 kDa      | 100%                                      | 0.03%                                      | 4                                     | 7                                     | 29                          | 16%                                 |
| C_simus           | Mudpit_v140312v05        | 12 kDa      | 100%                                      | 0.03%                                      | 8                                     | 9                                     | 27                          | 66%                                 |

| <b>Bio Sample</b> | <b>MS/MS Sample name</b> | <b>M.W.</b> | <b>Protein identification probability</b> | <b>Protein percentage of total spectra</b> | <b>Exclusive unique peptide count</b> | <b>Exclusive unique peptide count</b> | <b>Total spectrum count</b> | <b>Percentage sequence coverage</b> |
|-------------------|--------------------------|-------------|-------------------------------------------|--------------------------------------------|---------------------------------------|---------------------------------------|-----------------------------|-------------------------------------|
| C_simus           | Mudpit_v140312v05        | 93 kDa      | 100%                                      | 0.01%                                      | 6                                     | 7                                     | 10                          | 8%                                  |
| C_simus           | Mudpit_v140312v05        | 70 kDa      | 100%                                      | 0.01%                                      | 2                                     | 2                                     | 6                           | 11%                                 |
| C_simus           | Mudpit_v140312v05        | 32 kDa      | 100%                                      | 0.02%                                      | 1                                     | 1                                     | 24                          | 36%                                 |
| C_simus           | Mudpit_v140312v05        | 37 kDa      | 100%                                      | 0.01%                                      | 5                                     | 6                                     | 9                           | 18%                                 |
| C_simus           | Mudpit_v140312v05        | 40 kDa      | 97%                                       | 0.00%                                      | 0                                     | 0                                     | 3                           | 8%                                  |
| C_simus           | Mudpit_v140312v05        | 45 kDa      | 100%                                      | 0.01%                                      | 4                                     | 5                                     | 12                          | 15%                                 |
| C_simus           | Mudpit_v140312v05        | 58 kDa      | 100%                                      | 0.02%                                      | 10                                    | 10                                    | 18                          | 25%                                 |
| C_simus           | Mudpit_v140312v05        | 56 kDa      | 100%                                      | 0.01%                                      | 1                                     | 1                                     | 9                           | 14%                                 |
| C_simus           | Mudpit_v140312v05        | 53 kDa      | 100%                                      | 0.01%                                      | 0                                     | 0                                     | 9                           | 15%                                 |
| C_simus           | Mudpit_v140312v05        | 504 kDa     | 100%                                      | 0.00%                                      | 1                                     | 1                                     | 1                           | 0%                                  |
| C_simus           | Mudpit_v140312v05        | 55 kDa      | 100%                                      | 0.01%                                      | 6                                     | 6                                     | 8                           | 20%                                 |
| C_simus           | Mudpit_v140312v05        | 51 kDa      | 100%                                      | 0.01%                                      | 3                                     | 3                                     | 6                           | 9%                                  |
| C_simus           | Mudpit_v140312v05        | 49 kDa      | 97%                                       | 0.00%                                      | 0                                     | 0                                     | 5                           | 5%                                  |
| C_simus           | Mudpit_v140312v05        | 47 kDa      | 100%                                      | 0.01%                                      | 0                                     | 0                                     | 6                           | 9%                                  |
| C_simus           | Mudpit_v140312v05        | 46 kDa      | 46%                                       | 0.00%                                      | 0                                     | 0                                     | 5                           | 5%                                  |
| C_simus           | Mudpit_v140312v05        | 46 kDa      | 66%                                       | 0.00%                                      | 0                                     | 0                                     | 3                           | 7%                                  |
| C_simus           | Mudpit_v140312v05        | 45 kDa      | 8%                                        | 0.00%                                      | 0                                     | 0                                     | 5                           | 5%                                  |
| C_simus           | Mudpit_v140312v05        | 39 kDa      | 100%                                      | 0.01%                                      | 5                                     | 6                                     | 11                          | 14%                                 |
| C_simus           | Mudpit_v140312v05        | 50 kDa      | 100%                                      | 0.01%                                      | 4                                     | 4                                     | 11                          | 11%                                 |
| C_simus           | Mudpit_v140312v05        | 29 kDa      | 100%                                      | 0.02%                                      | 6                                     | 8                                     | 16                          | 32%                                 |
| C_simus           | Mudpit_v140312v05        | 29 kDa      | 34%                                       | 0.00%                                      | 0                                     | 0                                     | 2                           | 9%                                  |
| C_simus           | Mudpit_v140312v05        | 69 kDa      | 100%                                      | 0.00%                                      | 2                                     | 2                                     | 5                           | 6%                                  |
| C_simus           | Mudpit_v140312v05        | 469 kDa     | 100%                                      | 0.00%                                      | 0                                     | 0                                     | 2                           | 1%                                  |
| C_simus           | Mudpit_v140312v05        | 56 kDa      | 100%                                      | 0.00%                                      | 3                                     | 3                                     | 4                           | 10%                                 |
| C_simus           | Mudpit_v140312v05        | 102 kDa     | 100%                                      | 0.01%                                      | 4                                     | 4                                     | 6                           | 8%                                  |
| C_simus           | Mudpit_v140312v05        | 81 kDa      | 100%                                      | 0.01%                                      | 4                                     | 5                                     | 7                           | 7%                                  |
| C_simus           | Mudpit_v140312v05        | 55 kDa      | 100%                                      | 0.00%                                      | 1                                     | 1                                     | 2                           | 3%                                  |
| C_simus           | Mudpit_v140312v05        | 26 kDa      | 100%                                      | 0.01%                                      | 7                                     | 10                                    | 12                          | 27%                                 |
| C_simus           | Mudpit_v140312v05        | 272 kDa     | 100%                                      | 0.01%                                      | 5                                     | 5                                     | 9                           | 2%                                  |
| C_simus           | Mudpit_v140312v05        | 40 kDa      | 100%                                      | 0.01%                                      | 4                                     | 5                                     | 6                           | 17%                                 |

| <b>Bio Sample</b> | <b>MS/MS Sample name</b> | <b>M.W.</b> | <b>Protein identification probability</b> | <b>Protein percentage of total spectra</b> | <b>Exclusive unique peptide count</b> | <b>Exclusive unique peptide count</b> | <b>Total spectrum count</b> | <b>Percentage sequence coverage</b> |
|-------------------|--------------------------|-------------|-------------------------------------------|--------------------------------------------|---------------------------------------|---------------------------------------|-----------------------------|-------------------------------------|
| C_simus           | Mudpit_v140312v05        | 66 kDa      | 100%                                      | 0.00%                                      | 3                                     | 3                                     | 4                           | 7%                                  |
| C_simus           | Mudpit_v140312v05        | 135 kDa     | 100%                                      | 0.00%                                      | 3                                     | 3                                     | 4                           | 3%                                  |
| C_simus           | Mudpit_v140312v05        | 59 kDa      | 100%                                      | 0.01%                                      | 9                                     | 10                                    | 11                          | 15%                                 |
| C_simus           | Mudpit_v140312v05        | 89 kDa      | 100%                                      | 0.01%                                      | 1                                     | 1                                     | 7                           | 2%                                  |
| C_simus           | Mudpit_v140312v05        | 16 kDa      | 100%                                      | 0.00%                                      | 2                                     | 2                                     | 3                           | 17%                                 |
| C_simus           | Mudpit_v140312v05        | 38 kDa      | 100%                                      | 0.01%                                      | 5                                     | 5                                     | 8                           | 17%                                 |
| C_simus           | Mudpit_v140312v05        | 95 kDa      | 100%                                      | 0.00%                                      | 1                                     | 1                                     | 2                           | 3%                                  |
| C_simus           | Mudpit_v140312v05        | 44 kDa      | 100%                                      | 0.01%                                      | 5                                     | 6                                     | 13                          | 20%                                 |
| C_simus           | Mudpit_v140312v05        | 52 kDa      | 100%                                      | 0.01%                                      | 7                                     | 8                                     | 12                          | 20%                                 |
| C_simus           | Mudpit_v140312v05        | 15 kDa      | 100%                                      | 0.01%                                      | 3                                     | 3                                     | 7                           | 37%                                 |
| C_simus           | Mudpit_v140312v05        | 30 kDa      | 100%                                      | 0.00%                                      | 1                                     | 2                                     | 5                           | 15%                                 |
| C_simus           | Mudpit_v140312v05        | 17 kDa      | 98%                                       | 0.00%                                      | 0                                     | 0                                     | 3                           | 17%                                 |
| C_simus           | Mudpit_v140312v05        | 43 kDa      | 100%                                      | 0.01%                                      | 3                                     | 4                                     | 6                           | 15%                                 |
| C_simus           | Mudpit_v140312v05        | 50 kDa      | 100%                                      | 0.01%                                      | 3                                     | 4                                     | 11                          | 15%                                 |
| C_simus           | Mudpit_v140312v05        | 47 kDa      | 100%                                      | 0.01%                                      | 2                                     | 2                                     | 8                           | 15%                                 |
| C_simus           | Mudpit_v140312v05        | 28 kDa      | 100%                                      | 0.01%                                      | 5                                     | 6                                     | 8                           | 27%                                 |
| C_simus           | Mudpit_v140312v05        | 83 kDa      | 98%                                       | 0.00%                                      | 0                                     | 0                                     | 4                           | 5%                                  |
| C_simus           | Mudpit_v140312v05        | 18 kDa      | 95%                                       | 0.00%                                      | 0                                     | 0                                     | 4                           | 24%                                 |
| C_simus           | Mudpit_v140312v05        | 50 kDa      | 99%                                       | 0.00%                                      | 0                                     | 0                                     | 3                           | 9%                                  |
| C_simus           | Mudpit_v140312v05        | 50 kDa      | 95%                                       | 0.00%                                      | 0                                     | 0                                     | 3                           | 9%                                  |
| C_simus           | Mudpit_v140312v05        | 22 kDa      | 100%                                      | 0.01%                                      | 6                                     | 6                                     | 6                           | 44%                                 |
| C_simus           | Mudpit_v140312v05        | 60 kDa      | 100%                                      | 0.01%                                      | 8                                     | 8                                     | 9                           | 20%                                 |
| C_simus           | Mudpit_v140312v05        | 50 kDa      | 100%                                      | 0.01%                                      | 1                                     | 1                                     | 8                           | 13%                                 |
| C_simus           | Mudpit_v140312v05        | 50 kDa      | 89%                                       | 0.01%                                      | 0                                     | 0                                     | 6                           | 11%                                 |
| C_simus           | Mudpit_v140312v05        | 138 kDa     | 100%                                      | 0.00%                                      | 4                                     | 4                                     | 4                           | 3%                                  |
| C_simus           | Mudpit_v140312v05        | 83 kDa      | 100%                                      | 0.00%                                      | 3                                     | 3                                     | 3                           | 4%                                  |
| C_simus           | Mudpit_v140312v05        | 52 kDa      | 100%                                      | 0.00%                                      | 3                                     | 3                                     | 4                           | 12%                                 |
| C_simus           | Mudpit_v140312v05        | 99 kDa      | 100%                                      | 0.00%                                      | 1                                     | 1                                     | 1                           | 2%                                  |
| C_simus           | Mudpit_v140312v05        | 18 kDa      | 100%                                      | 0.00%                                      | 5                                     | 5                                     | 5                           | 27%                                 |
| C_simus           | Mudpit_v140312v05        | 354 kDa     | 100%                                      | 0.00%                                      | 2                                     | 2                                     | 2                           | 1%                                  |

| <b>Bio Sample</b> | <b>MS/MS Sample name</b> | <b>M.W.</b> | <b>Protein identification probability</b> | <b>Protein percentage of total spectra</b> | <b>Exclusive unique peptide count</b> | <b>Exclusive unique peptide count</b> | <b>Total spectrum count</b> | <b>Percentage sequence coverage</b> |
|-------------------|--------------------------|-------------|-------------------------------------------|--------------------------------------------|---------------------------------------|---------------------------------------|-----------------------------|-------------------------------------|
| C_simus           | Mudpit_v140312v05        | 28 kDa      | 100%                                      | 0.00%                                      | 3                                     | 4                                     | 4                           | 19%                                 |
| C_simus           | Mudpit_v140312v05        | 60 kDa      | 100%                                      | 0.00%                                      | 2                                     | 2                                     | 4                           | 5%                                  |
| C_simus           | Mudpit_v140312v05        | 28 kDa      | 100%                                      | 0.00%                                      | 1                                     | 1                                     | 3                           | 8%                                  |
| C_simus           | Mudpit_v140312v05        | 28 kDa      | 100%                                      | 0.00%                                      | 1                                     | 1                                     | 3                           | 7%                                  |
| C_simus           | Mudpit_v140312v05        | 24 kDa      | 100%                                      | 0.00%                                      | 1                                     | 1                                     | 5                           | 20%                                 |
| C_simus           | Mudpit_v140312v05        | 24 kDa      | 100%                                      | 0.00%                                      | 1                                     | 1                                     | 5                           | 17%                                 |
| C_simus           | Mudpit_v140312v05        | 30 kDa      | 100%                                      | 0.00%                                      | 1                                     | 1                                     | 3                           | 11%                                 |
| C_simus           | Mudpit_v140312v05        | 61 kDa      | 100%                                      | 0.00%                                      | 2                                     | 2                                     | 2                           | 4%                                  |
| C_simus           | Mudpit_v140312v05        | 22 kDa      | 100%                                      | 0.00%                                      | 4                                     | 5                                     | 5                           | 37%                                 |
| C_simus           | Mudpit_v140312v05        | 23 kDa      | 100%                                      | 0.00%                                      | 4                                     | 5                                     | 5                           | 36%                                 |
| C_simus           | Mudpit_v140312v05        | 26 kDa      | 100%                                      | 0.01%                                      | 2                                     | 2                                     | 8                           | 11%                                 |
| C_simus           | Mudpit_v140312v05        | 57 kDa      | 100%                                      | 0.01%                                      | 4                                     | 4                                     | 13                          | 10%                                 |
| C_simus           | Mudpit_v140312v05        | 61 kDa      | 100%                                      | 0.00%                                      | 3                                     | 3                                     | 5                           | 7%                                  |
| C_simus           | Mudpit_v140312v05        | 193 kDa     | 100%                                      | 0.00%                                      | 1                                     | 2                                     | 2                           | 1%                                  |
| C_simus           | Mudpit_v140312v05        | 36 kDa      | 100%                                      | 0.01%                                      | 2                                     | 2                                     | 9                           | 10%                                 |
| C_simus           | Mudpit_v140312v05        | 23 kDa      | 100%                                      | 0.00%                                      | 4                                     | 4                                     | 5                           | 30%                                 |
| C_simus           | Mudpit_v140312v05        | 39 kDa      | 100%                                      | 0.00%                                      | 1                                     | 1                                     | 1                           | 3%                                  |
| C_simus           | Mudpit_v140312v05        | 50 kDa      | 100%                                      | 0.01%                                      | 2                                     | 2                                     | 9                           | 12%                                 |
| C_simus           | Mudpit_v140312v05        | 22 kDa      | 100%                                      | 0.00%                                      | 1                                     | 1                                     | 1                           | 7%                                  |
| C_simus           | Mudpit_v140312v05        | 25 kDa      | 100%                                      | 0.00%                                      | 2                                     | 2                                     | 3                           | 18%                                 |
| C_simus           | Mudpit_v140312v05        | 55 kDa      | 100%                                      | 0.00%                                      | 4                                     | 4                                     | 4                           | 9%                                  |
| C_simus           | Mudpit_v140312v05        | 35 kDa      | 100%                                      | 0.01%                                      | 6                                     | 7                                     | 7                           | 22%                                 |
| C_simus           | Mudpit_v140312v05        | 106 kDa     | 100%                                      | 0.00%                                      | 1                                     | 1                                     | 1                           | 2%                                  |
| C_simus           | Mudpit_v140312v05        | 25 kDa      | 100%                                      | 0.00%                                      | 3                                     | 3                                     | 5                           | 30%                                 |
| C_simus           | Mudpit_v140312v05        | 50 kDa      | 100%                                      | 0.00%                                      | 2                                     | 3                                     | 4                           | 7%                                  |
| C_simus           | Mudpit_v140312v05        | 35 kDa      | 100%                                      | 0.00%                                      | 2                                     | 2                                     | 2                           | 6%                                  |
| C_simus           | Mudpit_v140312v05        | 68 kDa      | 94%                                       | 0.00%                                      | 0                                     | 0                                     | 0                           | 0%                                  |
| C_simus           | Mudpit_v140312v05        | 44 kDa      | 100%                                      | 0.02%                                      | 2                                     | 2                                     | 16                          | 24%                                 |
| C_simus           | Mudpit_v140312v05        | 39 kDa      | 100%                                      | 0.00%                                      | 3                                     | 4                                     | 4                           | 10%                                 |
| C_simus           | Mudpit_v140312v05        | 43 kDa      | 100%                                      | 0.00%                                      | 1                                     | 1                                     | 1                           | 6%                                  |

| <b>Bio Sample</b> | <b>MS/MS Sample name</b> | <b>M.W.</b> | <b>Protein identification probability</b> | <b>Protein percentage of total spectra</b> | <b>Exclusive unique peptide count</b> | <b>Exclusive unique peptide count</b> | <b>Total spectrum count</b> | <b>Percentage sequence coverage</b> |
|-------------------|--------------------------|-------------|-------------------------------------------|--------------------------------------------|---------------------------------------|---------------------------------------|-----------------------------|-------------------------------------|
| C_simus           | Mudpit_v140312v05        | 13 kDa      | 100%                                      | 0.00%                                      | 2                                     | 2                                     | 2                           | 28%                                 |
| C_simus           | Mudpit_v140312v05        | 15 kDa      | 16%                                       | 0.00%                                      | 0                                     | 0                                     | 1                           | 8%                                  |
| C_simus           | Mudpit_v140312v05        | 21 kDa      | 100%                                      | 0.00%                                      | 0                                     | 0                                     | 3                           | 23%                                 |
| C_simus           | Mudpit_v140312v05        | 83 kDa      | 98%                                       | 0.00%                                      | 0                                     | 0                                     | 2                           | 2%                                  |
| C_simus           | Mudpit_v140312v05        | 27 kDa      | 100%                                      | 0.01%                                      | 3                                     | 4                                     | 6                           | 14%                                 |
| C_simus           | Mudpit_v140312v05        | 22 kDa      | 100%                                      | 0.00%                                      | 3                                     | 3                                     | 4                           | 15%                                 |
| C_simus           | Mudpit_v140312v05        | 53 kDa      | 100%                                      | 0.00%                                      | 2                                     | 2                                     | 2                           | 4%                                  |
| C_simus           | Mudpit_v140312v05        | 23 kDa      | 74%                                       | 0.00%                                      | 0                                     | 0                                     | 4                           | 12%                                 |
| C_simus           | Mudpit_v140312v05        | 26 kDa      | 100%                                      | 0.00%                                      | 0                                     | 0                                     | 5                           | 19%                                 |
| C_simus           | Mudpit_v140312v05        | 15 kDa      | 100%                                      | 0.00%                                      | 3                                     | 3                                     | 5                           | 22%                                 |
| C_simus           | Mudpit_v140312v05        | 137 kDa     | 100%                                      | 0.00%                                      | 2                                     | 2                                     | 2                           | 2%                                  |
| C_simus           | Mudpit_v140312v05        | 21 kDa      | 100%                                      | 0.00%                                      | 1                                     | 1                                     | 1                           | 6%                                  |
| C_simus           | Mudpit_v140312v05        | 21 kDa      | 100%                                      | 0.00%                                      | 2                                     | 2                                     | 2                           | 13%                                 |
| C_simus           | Mudpit_v140312v05        | 24 kDa      | 100%                                      | 0.00%                                      | 3                                     | 3                                     | 4                           | 16%                                 |
| C_simus           | Mudpit_v140312v05        | 21 kDa      | 100%                                      | 0.00%                                      | 3                                     | 3                                     | 3                           | 33%                                 |
| C_simus           | Mudpit_v140312v05        | 50 kDa      | 100%                                      | 0.00%                                      | 2                                     | 2                                     | 2                           | 6%                                  |
| C_simus           | Mudpit_v140312v05        | 46 kDa      | 100%                                      | 0.00%                                      | 3                                     | 3                                     | 4                           | 10%                                 |
| C_simus           | Mudpit_v140312v05        | 139 kDa     | 100%                                      | 0.00%                                      | 3                                     | 3                                     | 3                           | 3%                                  |
| C_simus           | Mudpit_v140312v05        | 29 kDa      | 100%                                      | 0.00%                                      | 3                                     | 3                                     | 4                           | 13%                                 |
| C_simus           | Mudpit_v140312v05        | 138 kDa     | 100%                                      | 0.00%                                      | 3                                     | 3                                     | 3                           | 3%                                  |
| C_simus           | Mudpit_v140312v05        | 26 kDa      | 100%                                      | 0.00%                                      | 1                                     | 2                                     | 2                           | 5%                                  |
| C_simus           | Mudpit_v140312v05        | 112 kDa     | 100%                                      | 0.00%                                      | 1                                     | 1                                     | 5                           | 1%                                  |
| C_simus           | Mudpit_v140312v05        | 24 kDa      | 100%                                      | 0.00%                                      | 1                                     | 1                                     | 2                           | 10%                                 |
| C_simus           | Mudpit_v140312v05        | 37 kDa      | 100%                                      | 0.00%                                      | 1                                     | 1                                     | 1                           | 3%                                  |
| C_simus           | Mudpit_v140312v05        | 45 kDa      | 100%                                      | 0.00%                                      | 2                                     | 2                                     | 3                           | 7%                                  |
| C_simus           | Mudpit_v140312v05        | 23 kDa      | 100%                                      | 0.00%                                      | 2                                     | 2                                     | 3                           | 15%                                 |
| C_simus           | Mudpit_v140312v05        | 48 kDa      | 100%                                      | 0.00%                                      | 3                                     | 3                                     | 3                           | 7%                                  |
| C_simus           | Mudpit_v140312v05        | 51 kDa      | 100%                                      | 0.00%                                      | 2                                     | 2                                     | 2                           | 5%                                  |
| C_simus           | Mudpit_v140312v05        | 32 kDa      | 100%                                      | 0.00%                                      | 3                                     | 3                                     | 3                           | 15%                                 |
| C_simus           | Mudpit_v140312v05        | 52 kDa      | 98%                                       | 0.00%                                      | 0                                     | 0                                     | 0                           | 0%                                  |

| <b>Bio Sample</b> | <b>MS/MS Sample name</b> | <b>M.W.</b> | <b>Protein identification probability</b> | <b>Protein percentage of total spectra</b> | <b>Exclusive unique peptide count</b> | <b>Exclusive unique peptide count</b> | <b>Total spectrum count</b> | <b>Percentage sequence coverage</b> |
|-------------------|--------------------------|-------------|-------------------------------------------|--------------------------------------------|---------------------------------------|---------------------------------------|-----------------------------|-------------------------------------|
| C_simus           | Mudpit_v140312v05        | 53 kDa      | 98%                                       | 0.00%                                      | 0                                     | 0                                     | 1                           | 2%                                  |
| C_simus           | Mudpit_v140312v05        | 17 kDa      | 98%                                       | 0.00%                                      | 1                                     | 1                                     | 1                           | 11%                                 |
| C_simus           | Mudpit_v140312v05        | 19 kDa      | 76%                                       | 0.00%                                      | 0                                     | 0                                     | 0                           | 0%                                  |
| C_simus           | Mudpit_v140312v05        | 20 kDa      | 100%                                      | 0.00%                                      | 1                                     | 1                                     | 3                           | 31%                                 |
| C_simus           | Mudpit_v140312v05        | 46 kDa      | 100%                                      | 0.00%                                      | 2                                     | 2                                     | 2                           | 10%                                 |
| C_simus           | Mudpit_v140312v05        | 101 kDa     | 12%                                       | 0.00%                                      | 0                                     | 0                                     | 0                           | 0%                                  |
| C_simus           | Mudpit_v140312v05        | 22 kDa      | 100%                                      | 0.00%                                      | 2                                     | 3                                     | 3                           | 13%                                 |
| C_simus           | Mudpit_v140312v05        | 17 kDa      | 100%                                      | 0.00%                                      | 1                                     | 2                                     | 2                           | 10%                                 |
| C_simus           | Mudpit_v140312v05        | 209 kDa     | 7%                                        | 0.00%                                      | 0                                     | 0                                     | 0                           | 0%                                  |
| C_simus           | Mudpit_v140312v05        | 12 kDa      | 100%                                      | 0.00%                                      | 2                                     | 3                                     | 5                           | 36%                                 |
| C_simus           | Mudpit_v140312v05        | 19 kDa      | 99%                                       | 0.00%                                      | 0                                     | 0                                     | 0                           | 0%                                  |
| C_simus           | Mudpit_v140312v05        | 19 kDa      | 99%                                       | 0.00%                                      | 1                                     | 1                                     | 1                           | 8%                                  |
| C_simus           | Mudpit_v140312v05        | 14 kDa      | 100%                                      | 0.00%                                      | 1                                     | 1                                     | 2                           | 20%                                 |
| C_simus           | Mudpit_v140312v05        | 48 kDa      | 100%                                      | 0.00%                                      | 3                                     | 3                                     | 3                           | 8%                                  |
| C_simus           | Mudpit_v140312v05        | 62 kDa      | 37%                                       | 0.00%                                      | 0                                     | 0                                     | 1                           | 2%                                  |
| C_simus           | Mudpit_v140312v05        | 118 kDa     | 22%                                       | 0.00%                                      | 0                                     | 0                                     | 0                           | 0%                                  |
| C_simus           | Mudpit_v140312v05        | 130 kDa     | 100%                                      | 0.00%                                      | 3                                     | 3                                     | 3                           | 3%                                  |
| C_simus           | Mudpit_v140312v05        | 14 kDa      | 97%                                       | 0.00%                                      | 1                                     | 1                                     | 1                           | 10%                                 |
| C_simus           | Mudpit_v140312v05        | 46 kDa      | 100%                                      | 0.00%                                      | 1                                     | 1                                     | 1                           | 3%                                  |
| C_simus           | Mudpit_v140312v05        | 13 kDa      | 100%                                      | 0.00%                                      | 2                                     | 2                                     | 4                           | 13%                                 |
| C_simus           | Mudpit_v140312v05        | 27 kDa      | 100%                                      | 0.00%                                      | 1                                     | 1                                     | 2                           | 9%                                  |
| C_simus           | Mudpit_v140312v05        | 74 kDa      | 99%                                       | 0.00%                                      | 0                                     | 0                                     | 2                           | 3%                                  |
| C_simus           | Mudpit_v140312v05        | 26 kDa      | 96%                                       | 0.00%                                      | 1                                     | 1                                     | 1                           | 8%                                  |
| C_simus           | Mudpit_v140312v05        | 25 kDa      | 100%                                      | 0.00%                                      | 2                                     | 2                                     | 4                           | 12%                                 |
| C_simus           | Mudpit_v140312v05        | 25 kDa      | 100%                                      | 0.00%                                      | 3                                     | 3                                     | 3                           | 22%                                 |
| C_simus           | Mudpit_v140312v05        | 44 kDa      | 100%                                      | 0.00%                                      | 2                                     | 2                                     | 2                           | 7%                                  |
| C_simus           | Mudpit_v140312v05        | 11 kDa      | 100%                                      | 0.00%                                      | 1                                     | 1                                     | 1                           | 10%                                 |
| C_simus           | Mudpit_v140312v05        | 12 kDa      | 100%                                      | 0.00%                                      | 2                                     | 2                                     | 3                           | 24%                                 |
| C_simus           | Mudpit_v140312v05        | 86 kDa      | 11%                                       | 0.00%                                      | 0                                     | 0                                     | 0                           | 0%                                  |
| C_simus           | Mudpit_v140312v05        | 85 kDa      | 20%                                       | 0.00%                                      | 0                                     | 0                                     | 2                           | 2%                                  |



| <b>Bio Sample</b> | <b>MS/MS Sample name</b> | <b>M.W.</b> | <b>Protein identification probability</b> | <b>Protein percentage of total spectra</b> | <b>Exclusive unique peptide count</b> | <b>Exclusive unique peptide count</b> | <b>Total spectrum count</b> | <b>Percentage sequence coverage</b> |
|-------------------|--------------------------|-------------|-------------------------------------------|--------------------------------------------|---------------------------------------|---------------------------------------|-----------------------------|-------------------------------------|
| C_simus           | Mudpit_v140312v05        | 12 kDa      | 96%                                       | 0.00%                                      | 1                                     | 1                                     | 1                           | 9%                                  |
| C_simus           | Mudpit_v140312v05        | 50 kDa      | 63%                                       | 0.00%                                      | 0                                     | 0                                     | 0                           | 0%                                  |
| C_simus           | Mudpit_v140312v05        | 21 kDa      | 100%                                      | 0.00%                                      | 4                                     | 4                                     | 4                           | 33%                                 |
| C_simus           | Mudpit_v140312v05        | 37 kDa      | 100%                                      | 0.00%                                      | 2                                     | 2                                     | 2                           | 9%                                  |
| C_simus           | Mudpit_v140312v05        | 29 kDa      | 100%                                      | 0.00%                                      | 1                                     | 1                                     | 1                           | 4%                                  |
| C_simus           | Mudpit_v140312v05        | 34 kDa      | 99%                                       | 0.00%                                      | 0                                     | 0                                     | 0                           | 0%                                  |
| C_simus           | Mudpit_v140312v05        | 14 kDa      | 100%                                      | 0.00%                                      | 2                                     | 2                                     | 4                           | 18%                                 |
| C_simus           | Mudpit_v140312v05        | 71 kDa      | 98%                                       | 0.00%                                      | 0                                     | 0                                     | 4                           | 5%                                  |
| C_simus           | Mudpit_v140312v05        | 24 kDa      | 100%                                      | 0.00%                                      | 2                                     | 2                                     | 2                           | 11%                                 |
| C_simus           | Mudpit_v140312v05        | 37 kDa      | 26%                                       | 0.00%                                      | 0                                     | 0                                     | 3                           | 4%                                  |
| C_simus           | Mudpit_v140312v05        | 18 kDa      | 21%                                       | 0.00%                                      | 0                                     | 0                                     | 0                           | 0%                                  |
| C_simus           | Mudpit_v140312v05        | 18 kDa      | 100%                                      | 0.00%                                      | 2                                     | 2                                     | 2                           | 18%                                 |
| C_simus           | Mudpit_v140312v05        | 23 kDa      | 100%                                      | 0.00%                                      | 1                                     | 1                                     | 1                           | 5%                                  |
| C_simus           | Mudpit_v140312v05        | 17 kDa      | 96%                                       | 0.00%                                      | 1                                     | 1                                     | 1                           | 7%                                  |
| C_simus           | Mudpit_v140312v05        | 22 kDa      | 85%                                       | 0.00%                                      | 0                                     | 0                                     | 0                           | 0%                                  |
| C_simus           | Mudpit_v140312v05        | 22 kDa      | 96%                                       | 0.00%                                      | 1                                     | 1                                     | 1                           | 7%                                  |
| C_simus           | Mudpit_v140312v05        | 23 kDa      | 100%                                      | 0.00%                                      | 1                                     | 1                                     | 1                           | 6%                                  |
| C_simus           | Mudpit_v140312v05        | 21 kDa      | 56%                                       | 0.00%                                      | 0                                     | 0                                     | 0                           | 0%                                  |
| C_simus           | Mudpit_v140312v05        | 23 kDa      | 100%                                      | 0.00%                                      | 2                                     | 2                                     | 2                           | 12%                                 |
