# Supplementary material for: Tissue Localization and Extracellular Matrix Degradation by PI, PII and PIII Snake Venom Metalloproteinases: Clues on the Mechanisms of Venom-Induced Hemorrhage
Source: PubMed Central journal article supplement (PMC4409213; doi:10.1371/journal.pntd.0003731), 2015-04-24
Supplement: pntd.0003731.s002.pdf [file pntd.0003731.s002.pdf]

**S2 Table. Serum proteins identified in wound exudates collected from mice injected with PI, PII or PIII SVMPs.**

| Proteins                                     | Accession Number | Mol. Mass | Quantitative value |           |           |
|----------------------------------------------|------------------|-----------|--------------------|-----------|-----------|
|                                              |                  |           | P-I                | P-II      | P-III     |
| Serum albumin                                | P07724           | 69 kDa    | 1,126              | 1,132     | 1,421     |
| Serotransferrin                              | Q921I1           | 77 kDa    | 565                | 434       | 491       |
| Complement C3                                | P01027           | 186 kDa   | 425                | 309       | 309       |
| Alpha-2-macroglobulin                        | D3YW52           | 167 kDa   | 234                | 182       | 208       |
| Alpha-2-macroglobulin                        | Q61838           | 166 kDa   | 230                | 178       | 208       |
| Apolipoprotein A-I                           | Q00623           | 31 kDa    | 74                 | 124       | 123       |
| Alpha-1-antitrypsin 1-3                      | Q00896           | 46 kDa    | 87                 | 88        | 106       |
| Alpha-1-antitrypsin 1-2                      | P22599           | 46 kDa    | 73                 | 72        | 75        |
| Alpha-1-antitrypsin 1-4                      | Q00897           | 46 kDa    | 57                 | 64        | 71        |
| Serine protease inhibitor A3K                | P07759           | 47 kDa    | 159                | 157       | 173       |
| Serine protease inhibitor A3M                | Q03734           | 47 kDa    | 56                 | 36        | 41        |
| Serine protease inhibitor A3N                | Q91WP6           | 47 kDa    | 39                 | 26        | 26        |
| Murinoglobulin-1                             | P28665           | 165 kDa   | 112                | 62        | 60        |
| Murinoglobulin-2                             | P28666           | 162 kDa   | 65                 | 40        | 26        |
| Hemopexin                                    | Q91X72           | 51 kDa    | 106                | 75        | 89        |
| Isoform LMW of Kininogen-1                   | O08677-2         | 48 kDa    | 92                 | 90        | 108       |
| Kininogen-1                                  | D3YTY9 (+2)      | 53 kDa    | 82                 | 86        | 90        |
| Ceruloplasmin                                | G3X8Q5           | 124 kDa   | 123                | 75        | 72        |
| Ceruloplasmin                                | E9PZD8           | 124 kDa   | 120                | 72        | 67        |
| Plasminogen                                  | P20918           | 91 kDa    | 63                 | 41        | 39        |
| Apolipoprotein A-IV                          | P06728           | 45 kDa    | 21                 | <b>70</b> | 52        |
| Fibrinogen gamma chain                       | Q8VCM7           | 49 kDa    | <b>121</b>         | <b>50</b> | 6         |
| Fibronectin                                  | P11276           | 273 kDa   | 87                 | 34        | 43        |
| Fibrinogen beta chain                        | Q8K0E8           | 55 kDa    | <b>121</b>         | <b>35</b> | 3         |
| Alpha-2-HS-glycoprotein                      | P29699           | 37 kDa    | 31                 | 48        | 42        |
| Ig kappa chain C region                      | P01837           | 12 kDa    | 34                 | 33        | 57        |
| Haptoglobin                                  | Q61646           | 39 kDa    | 50                 | 24        | 21        |
| Complement factor H                          | E9Q8I0           | 141 kDa   | <b>49</b>          | 22        | 14        |
| Complement C4-B                              | P01029           | 193 kDa   | 23                 | 27        | 22        |
| Alpha-1B-glycoprotein                        | Q19LI2           | 57 kDa    | 10                 | 14        | <b>38</b> |
| Complement factor B                          | B8JIM6 (+1)      | 80 kDa    | 6                  | 10        | 7         |
| Antithrombin-III                             | P32261           | 52 kDa    | 19                 | 28        | 19        |
| Inter-alpha trypsin inhibitor, heavy chain 2 | G3X977 (+1)      | 106 kDa   | 11                 | 15        | 20        |
| Apolipoprotein A-II                          | P09813           | 11 kDa    | <b>22</b>          | 6         | <b>36</b> |
| Inter alpha-trypsin inhibitor, heavy chain 4 | A6X935 (+2)      | 105 kDa   | 24                 | 15        | 19        |

| Proteins                                       | Accession Number | Mol. Mass | Quantitative value |          |           |
|------------------------------------------------|------------------|-----------|--------------------|----------|-----------|
|                                                |                  |           | P-I                | P-II     | P-III     |
| Ig gamma-1 chain C region, membrane-bound form | P01869           | 43 kDa    | 18                 | 15       | 14        |
| Plasma kallikrein                              | P26262           | 71 kDa    | 11                 | 11       | 9         |
| Complement factor I                            | Q61129           | 67 kDa    | 11                 | 4        | 4         |
| Prothrombin                                    | P19221           | 70 kDa    | 6                  | 5        | 6         |
| Apolipoprotein B-100 (Fragment)                | E9Q1Y3           | 504 kDa   | <b>24</b>          | 1        | 1         |
| Alpha-2-antiplasmin                            | Q61247           | 55 kDa    | 6                  | 9        | 7         |
| Beta-2-glycoprotein 1                          | Q01339           | 39 kDa    | 6                  | 9        | 10        |
| Ig mu chain C region                           | P01872 (+1)      | 50 kDa    | 15                 | 6        | 10        |
| Plasma protease C1 inhibitor                   | P97290           | 56 kDa    | 11                 | 11       | 4         |
| Inter-alpha-trypsin inhibitor heavy chain H1   | F8WJ05 (+1)      | 102 kDa   | 15                 | 9        | 6         |
| Vitronectin                                    | P29788           | 55 kDa    | <u>7</u>           | <u>5</u> | 2         |
| Serum amyloid P-component                      | P12246           | 26 kDa    | 11                 | 8        | 11        |
| Serum paraoxonase/arylesterase 1               | P52430           | 40 kDa    | 6                  | 5        | 6         |
| Coagulation factor XII                         | Q80YC5           | 66 kDa    | 10                 | 13       | 4         |
| Ig gamma-2B chain C region                     | P01867           | 44 kDa    | <b>6</b>           | 0        | <b>12</b> |
| Inter-alpha-trypsin inhibitor heavy chain H3   | Q61704           | 99 kDa    | 3                  | 3        | 1         |
| Isoform 2 of Complement factor D               | P03953-2         | 28 kDa    | 6                  | 7        | 4         |
| Alpha-1-acid glycoprotein 1                    | Q60590           | 24 kDa    | 1                  | 0        | <u>5</u>  |
| Alpha-1-acid glycoprotein 2                    | P07361           | 24 kDa    | 1                  | 0        | <u>5</u>  |
| Complement component C8 alpha chain            | A2A998           | 61 kDa    | 2                  | 5        | 2         |
| Ig heavy chain V region 6.96                   | P18528           | 11 kDa    | <u>3</u>           | <u>3</u> | 1         |
| Ig heavy chain V region 914                    | P18527           | 11 kDa    | <u>3</u>           | <u>3</u> | 0         |
| Ig heavy chain V region MOPC 21 (Fragment)     | P01783           | 15 kDa    | <b>4</b>           | 0        | 1         |
| Ig heavy chain V region 345                    | P18526           | 13 kDa    | <u>3</u>           | 0        | 1         |
| Complement C1q subcomponent subunit B          | P14106           | 27 kDa    | 4                  | 4        | 6         |
| Complement C1q subcomponent subunit C          | Q02105           | 26 kDa    | 1                  | <u>3</u> | 2         |
| Ig heavy chain V region PJ14                   | P01820           | 12 kDa    | 5                  | 4        | 4         |
| Apolipoprotein D                               | P51910           | 22 kDa    | 4                  | 2        | 3         |
| Ig kappa chain V-V region HP R16.7             | P01644 (+1)      | 12 kDa    | 2                  | 1        | <u>5</u>  |

Values in bold and underlined correspond to proteins for which at least one SVMP induced an increment of at least three times as compared to another SVMP.
