# Supplementary material for: Tissue Localization and Extracellular Matrix Degradation by PI, PII and PIII Snake Venom Metalloproteinases: Clues on the Mechanisms of Venom-Induced Hemorrhage
Source: PubMed Central journal article supplement (PMC4409213; doi:10.1371/journal.pntd.0003731), 2015-04-24
Supplement: pntd.0003731.s003.pdf [file pntd.0003731.s003.pdf]

**S3 Table. Coagulation factors identified in wound exudates collected from mice injected with PI, PII or PIII SVMPs.**

| Proteins               | Accession Number | Mol. Mass | Quantitative value |                  |                 |
|------------------------|------------------|-----------|--------------------|------------------|-----------------|
|                        |                  |           | P-I                | P-II             | P-III           |
| Fibrinogen gamma chain | Q8VCM7           | 49 kDa    | <b><u>121</u></b>  | <b><u>50</u></b> | 6               |
| Fibrinogen beta chain  | Q8K0E8           | 55 kDa    | <b><u>121</u></b>  | <b><u>35</u></b> | 3               |
| Prothrombin            | P19221           | 70 kDa    | 6                  | 5                | 6               |
| Coagulation factor XII | Q80YC5           | 66 kDa    | 10                 | <b><u>13</u></b> | 4               |
| Coagulation factor X   | Q3U3V1           | 55 kDa    | 1                  | 2                | <b><u>4</u></b> |

Values in bold and underlined correspond to proteins for which at least one SVMP induced an increment of at least three times as compared to another SVMP.
