# Supplementary material for: Tissue Localization and Extracellular Matrix Degradation by PI, PII and PIII Snake Venom Metalloproteinases: Clues on the Mechanisms of Venom-Induced Hemorrhage
Source: PubMed Central journal article supplement (PMC4409213; doi:10.1371/journal.pntd.0003731), 2015-04-24
Supplement: pntd.0003731.s004.pdf [file pntd.0003731.s004.pdf]

**S4 Table. Serum proteinase inhibitors identified in wound exudates collected from mice injected with PI, PII or PIII SVMPs.**

| Protein                                      | Accession Number | Mol. Mass | Quantitative value |                 |       |
|----------------------------------------------|------------------|-----------|--------------------|-----------------|-------|
|                                              |                  |           | P-I                | P-II            | P-III |
| Alpha-2-macroglobulin                        | Q61838           | 166 kDa   | 230                | 178             | 208   |
| Alpha-2-macroglobulin                        | D3YW52           | 167 kDa   | 234                | 182             | 208   |
| Alpha-1-antitrypsin 1-3                      | Q00896           | 46 kDa    | 87                 | 88              | 106   |
| Alpha-1-antitrypsin 1-2                      | P22599           | 46 kDa    | 73                 | 72              | 75    |
| Alpha-1-antitrypsin 1-4                      | Q00897           | 46 kDa    | 57                 | 64              | 71    |
| Serine protease inhibitor A3K                | P07759           | 47 kDa    | 159                | 157             | 173   |
| Serine protease inhibitor A3M                | Q03734           | 47 kDa    | 56                 | 36              | 40    |
| Serine protease inhibitor A3N                | Q91WP6           | 47 kDa    | 39                 | 26              | 26    |
| Murinoglobulin-1                             | P28665           | 165 kDa   | 112                | 62              | 60    |
| Murinoglobulin-2                             | P28666           | 162 kDa   | 65                 | 40              | 26    |
| Antithrombin-III                             | P32261           | 52 kDa    | 19                 | 28              | 20    |
| Inter-alpha trypsin inhibitor, heavy chain 2 | G3X977 (+1)      | 106 kDa   | 11                 | 15              | 20    |
| Inter alpha-trypsin inhibitor, heavy chain 4 | A6X935 (+2)      | 105 kDa   | 24                 | 16              | 20    |
| Alpha-2-antiplasmin                          | Q61247           | 55 kDa    | 6                  | 9               | 7     |
| Plasma protease C1 inhibitor                 | P97290           | 56 kDa    | 11                 | 11              | 4     |
| Inter-alpha-trypsin inhibitor heavy chain H1 | F8WJ05 (+1)      | 102 kDa   | 15                 | 9               | 6     |
| Inter-alpha-trypsin inhibitor heavy chain H3 | Q61704           | 99 kDa    | <b><u>3</u></b>    | <b><u>3</u></b> | 1     |

Values in bold and underlined correspond to proteins for which at least one SVMP induced an increment of at least three times as compared to another SVMP.
