# Supplementary material for: Tissue Localization and Extracellular Matrix Degradation by PI, PII and PIII Snake Venom Metalloproteinases: Clues on the Mechanisms of Venom-Induced Hemorrhage
Source: PubMed Central journal article supplement (PMC4409213; doi:10.1371/journal.pntd.0003731), 2015-04-24
Supplement: pntd.0003731.s005.pdf [file pntd.0003731.s005.pdf]

**S5 Table. Intracellular proteins identified in wound exudates collected from mice injected with PI, PII or PIII SVMPs.**

| Protein                                        | Accession Number | Mol. mass | Quantitative value |           |           |
|------------------------------------------------|------------------|-----------|--------------------|-----------|-----------|
|                                                |                  |           | P-I                | P-II      | P-III     |
| Hemoglobin subunit beta-2                      | P02089           | 16 kDa    | 143                | 263       | 152       |
| Beta-globin                                    | A8DUK4           | 16 kDa    | 154                | 340       | 215       |
| Hemoglobin subunit beta-1                      | P02088           | 16 kDa    | 198                | 377       | 249       |
| Hemoglobin subunit epsilon-Y2                  | P02104           | 16 kDa    | 17                 | 23        | 14        |
| Hemoglobin subunit alpha                       | P01942 (+1)      | 15 kDa    | 73                 | 196       | 175       |
| Creatine kinase M-type                         | P07310           | 43 kDa    | 63                 | 66        | 110       |
| Fructose-bisphosphate aldolase A               | P05064           | 39 kDa    | 29                 | 30        | 55        |
| Carboxylesterase 1C                            | P23953           | 61 kDa    | 68                 | 62        | 48        |
| Glyceraldehyde-3-phosphate dehydrogenase       | P16858           | 36 kDa    | 8                  | <b>31</b> | <b>44</b> |
| Actin, cytoplasmic 1                           | P60710           | 42 kDa    | 21                 | 50        | 19        |
| Actin, aortic smooth muscle                    | P62737           | 42 kDa    | 18                 | 45        | 17        |
| Actin, gamma-enteric smooth muscle             | P63268           | 42 kDa    | 18                 | 45        | 17        |
| Gelsolin                                       | P13020           | 86 kDa    | 33                 | 33        | 20        |
| Beta-enolase                                   | P21550           | 47 kDa    | 21                 | 18        | 27        |
| Gamma-enolase                                  | P17183           | 47 kDa    | 3                  | 6         | <b>12</b> |
| Carbonic anhydrase 2                           | P00920           | 29 kDa    | 11                 | <b>44</b> | 23        |
| L-lactate dehydrogenase                        | G5E8N5 (+1)      | 40 kDa    | 18                 | 17        | 24        |
| Glycogen phosphorylase, muscle form            | Q9WUB3           | 97 kDa    | 1                  | 1         | <b>8</b>  |
| Carbonic anhydrase 3                           | P16015           | 29 kDa    | 9                  | 9         | 29        |
| Parvalbumin alpha                              | P32848           | 12 kDa    | 8                  | 19        | 25        |
| Triosephosphate isomerase                      | P17751           | 32 kDa    | 12                 | 22        | 22        |
| Phosphoglycerate kinase 1                      | P09411           | 45 kDa    | 7                  | 7         | 11        |
| Phosphoglycerate kinase 2                      | P09041           | 45 kDa    | 3                  | 2         | 4         |
| Isoform M1 of Pyruvate kinase PKM              | P52480-2         | 58 kDa    | 8                  | 7         | 17        |
| Phosphoglycerate mutase                        | O70250           | 29 kDa    | 10                 | 11        | 15        |
| Phosphoglycerate mutase 1                      | Q9DBJ1           | 29 kDa    | <b>7</b>           | 3         | 2         |
| Heat shock cognate 71 kDa protein              | Q504P4           | 69 kDa    | <b>18</b>          | 13        | 5         |
| Satty acid synthase                            | P19096           | 272 kDa   | 6                  | 4         | 8         |
| DNA-dependent protein kinase catalytic subunit | P97313           | 471 kDa   | 2                  | 1         | 2         |
| E3 ubiquitin-protein ligase Zswim2             | Q9D9X6           | 72 kDa    | 6                  | 6         | 5         |
| Transitional endoplasmic reticulum ATPase      | Q01853           | 89 kDa    | 2                  | <b>14</b> | <b>7</b>  |
| Superoxide dismutase [Cu-Zn]                   | P08228           | 16 kDa    | 5                  | 8         | 3         |
| Elongation factor 2                            | P58252           | 95 kDa    | 0                  | <b>6</b>  | 2         |
| Clusterin                                      | Q06890           | 52 kDa    | 1                  | <b>9</b>  | <b>11</b> |
| Nucleoside diphosphate kinase                  | E9PZF0           | 30 kDa    | 2                  | <b>10</b> | 5         |
| Nucleoside diphosphate kinase A                | P15532 (+1)      | 17 kDa    | 1                  | <b>6</b>  | 3         |

| Protein                                    | Accession Number | Mol. mass | Quantitative value |           |          |
|--------------------------------------------|------------------|-----------|--------------------|-----------|----------|
|                                            |                  |           | P-I                | P-II      | P-III    |
| Elongation factor 1-alpha 1                | P10126           | 50 kDa    | 11                 | 13        | 10       |
| Alpha-enolase                              | P17182           | 47 kDa    | 10                 | 14        | 7        |
| Carbonic anhydrase 1                       | P13634           | 28 kDa    | 6                  | 7         | 7        |
| Polyubiquitin-C                            | P0CG50           | 83 kDa    | 3                  | 6         | 4        |
| Ubiquitin-40S ribosomal protein S27a       | P62983           | 18 kDa    | 3                  | 6         | 4        |
| Tubulin alpha-1C chain                     | P68373           | 50 kDa    | 2                  | <u>7</u>  | 3        |
| Tubulin alpha-4A chain                     | P68368           | 50 kDa    | 2                  | 4         | 3        |
| Tubulin alpha-3 chain                      | P05214           | 50 kDa    | 2                  | 5         | 3        |
| Flavin reductase (NADPH)                   | Q923D2           | 22 kDa    | 1                  | <u>8</u>  | <u>6</u> |
| Carboxypeptidase N subunit 2               | Q9DBB9           | 60 kDa    | 5                  | 3         | 8        |
| Tubulin beta-4B chain                      | P68372           | 50 kDa    | 0                  | <u>16</u> | <u>7</u> |
| Tubulin beta-5 chain                       | P99024           | 50 kDa    | 0                  | <u>14</u> | <u>6</u> |
| Sulfhydryl oxidase 1                       | Q8BND5 (+1)      | 83 kDa    | 0                  | <u>10</u> | 3        |
| Carboxypeptidase N catalytic chain         | Q9JJN5           | 52 kDa    | 5                  | 6         | 4        |
| Peptidyl-prolyl cis-trans isomerase A      | P17742           | 18 kDa    | 6                  | 6         | 5        |
| Catalase                                   | P24270           | 60 kDa    | 2                  | 6         | 4        |
| 14-3-3 protein beta/alpha                  | Q9CQV8 (+1)      | 28 kDa    | 3                  | 3         | 3        |
| 14-3-3 protein gamma                       | P61982           | 28 kDa    | 2                  | 4         | 3        |
| Bisphosphoglycerate mutase                 | P15327           | 30 kDa    | 5                  | 5         | 3        |
| Glutathione peroxidase 1                   | P11352           | 22 kDa    | 4                  | 10        | 5        |
| Phosphoglucomutase-1                       | Q9D0F9           | 61 kDa    | 2                  | 5         | 5        |
| Elongation factor 1-alpha 2                | P62631           | 50 kDa    | 7                  | 9         | 8        |
| Adenylate kinase isoenzyme 1               | Q9R0Y5 (+1)      | 22 kDa    | 1                  | <u>3</u>  | 1        |
| Glutathione peroxidase 3                   | P46412           | 25 kDa    | 5                  | 3         | 3        |
| Peroxiredoxin 6                            | Q6GT24           | 25 kDa    | 3                  | 2         | 5        |
| Heat shock protein HSP 90-beta             | P11499           | 83 kDa    | <u>6</u>           | <u>6</u>  | 2        |
| Peroxiredoxin-1                            | P35700           | 22 kDa    | 3                  | 6         | 4        |
| Glutathione S-transferase Mu 1 (Fragment)  | F6WHQ7           | 23 kDa    | 2                  | 4         | 4        |
| Glutathione S-transferase Mu 1             | P10649           | 26 kDa    | 3                  | 4         | 5        |
| Glutathione S-transferase P 1              | P19157           | 24 kDa    | 3                  | 4         | 4        |
| Phosphatidylethanolamine-binding protein 1 | P70296           | 21 kDa    | 4                  | 6         | 3        |
| Elongation factor 1-gamma                  | Q9D8N0           | 50 kDa    | 3                  | 3         | 2        |
| Malate dehydrogenase, cytoplasmic          | P14152           | 37 kDa    | <u>4</u>           | <u>4</u>  | 1        |
| Rho GDP-dissociation inhibitor 1           | Q99PT1           | 23 kDa    | 1                  | <u>3</u>  | <u>3</u> |
| Guanine deaminase                          | Q9R111           | 51 kDa    | 1                  | <u>4</u>  | 2        |
| Calmodulin                                 | P62204 (+1)      | 17 kDa    | 1                  | <u>4</u>  | 1        |
| C-1-tetrahydrofolate synthase, cytoplasmic | Q922D8           | 101 kDa   | 0                  | 4         | 0        |
| Alcohol dehydrogenase class-3              | P28474           | 40 kDa    | 1                  | 2         | <u>5</u> |
| Maltase-glucoamylase                       | B5THE2           | 209 kDa   | <u>3</u>           | 0         | 0        |

| Protein                                                    | Accession Number | Mol. mass | Quantitative value |                 |       |
|------------------------------------------------------------|------------------|-----------|--------------------|-----------------|-------|
|                                                            |                  |           | P-I                | P-II            | P-III |
| Clathrin heavy chain                                       | Q5SXR6 (+1)      | 192 kDa   | 1                  | <b><u>3</u></b> | 0     |
| Ubiquitin-like modifier-activating enzyme 1                | Q02053           | 118 kDa   | 0                  | <b><u>4</u></b> | 0     |
| Myosin light chain 1/3, skeletal muscle isoform (Fragment) | E0CZ30 (+3)      | 14 kDa    | <b><u>4</u></b>    | <b><u>3</u></b> | 1     |
| Aspartate aminotransferase, cytoplasmic                    | P05201           | 46 kDa    | <b><u>3</u></b>    | 0               | 1     |
| L-lactate dehydrogenase B chain                            | P16125           | 37 kDa    | 5                  | 4               | 3     |

Values in bold and underlined correspond to proteins for which at least one SVMP induced an increment of at least three times as compared to another SVMP.
