# Supplementary material for: Tissue Localization and Extracellular Matrix Degradation by PI, PII and PIII Snake Venom Metalloproteinases: Clues on the Mechanisms of Venom-Induced Hemorrhage
Source: PubMed Central journal article supplement (PMC4409213; doi:10.1371/journal.pntd.0003731), 2015-04-24
Supplement: pntd.0003731.s006.pdf [file pntd.0003731.s006.pdf]

**S6 Table. Keratins identified in wound exudates collected from mice injected with PI, PII or PIII SVMPs.**

| Protein                                      | Accession Number | Mol. Mass | Quantitative value |                  |                  |
|----------------------------------------------|------------------|-----------|--------------------|------------------|------------------|
|                                              |                  |           | P-I                | P-II             | P-III            |
| Keratin, type II cytoskeletal 1              | P04104           | 66 kDa    | 18                 | <b><u>27</u></b> | 8                |
| Keratin, type II cytoskeletal 73             | Q6NXH9           | 59 kDa    | 8                  | 12               | 6                |
| Keratin, type II cytoskeletal 2 epidermal    | Q3TTY5           | 71 kDa    | <b><u>9</u></b>    | <b><u>13</u></b> | 0                |
| Keratin, type II cytoskeletal 2 oral         | Q3UV17           | 63 kDa    | <b><u>6</u></b>    | <b><u>11</u></b> | 1                |
| Keratin, type II cytoskeletal 5              | Q922U2           | 62 kDa    | <b><u>9</u></b>    | <b><u>9</u></b>  | 1                |
| Keratin, type II cytoskeletal 6B             | Q3UV11 (+1)      | 60 kDa    | <b><u>5</u></b>    | <b><u>5</u></b>  | 1                |
| Keratin, type II cytoskeletal 75             | Q8BGZ7           | 60 kDa    | <b><u>5</u></b>    | <b><u>5</u></b>  | 1                |
| Isoform 3 of Keratin, type I cytoskeletal 10 | P02535-3         | 50 kDa    | 24                 | 31               | 13               |
| Keratin, type I cytoskeletal 17              | Q9QWL7           | 48 kDa    | <b><u>8</u></b>    | <b><u>17</u></b> | 1                |
| Keratin, type I cytoskeletal 16              | Q9Z2K1           | 52 kDa    | 8                  | <b><u>20</u></b> | 5                |
| Keratin, type I cytoskeletal 13              | P08730           | 48 kDa    | <b><u>4</u></b>    | <b><u>10</u></b> | 0                |
| Keratin, type II cuticular Hb5               | Q9Z2T6           | 56 kDa    | <b><u>29</u></b>   | 4                | 8                |
| Keratin, type II cuticular Hb6               | P97861           | 53 kDa    | <b><u>31</u></b>   | 3                | 8                |
| Keratin, type I cuticular Ha5                | Q497I4           | 51 kDa    | 8                  | 5                | 6                |
| Keratin, type I cytoskeletal 40              | Q6IFX3           | 49 kDa    | <b><u>3</u></b>    | 0                | <b><u>4</u></b>  |
| Keratin, type I cuticular Ha1                | Q61765           | 47 kDa    | 11                 | 5                | 6                |
| Keratin, type I cuticular Ha3-II             | Q61897           | 46 kDa    | 11                 | 5                | 5                |
| Keratin, type I cuticular Ha3-I              | Q8K0Y2           | 46 kDa    | <b><u>7</u></b>    | 0                | <b><u>3</u></b>  |
| Keratin, type I cuticular Ha4                | Q9D646           | 45 kDa    | <b><u>8</u></b>    | 0                | <b><u>5</u></b>  |
| Keratin, type II cuticular Hb2               | Q99M74           | 57 kDa    | <b><u>5</u></b>    | 0                | <b><u>12</u></b> |

Values in bold and underlined correspond to proteins for which at least one SVMP induced an increment of at least three times as compared to another SVMP.
