# Supplementary material for: Tissue Localization and Extracellular Matrix Degradation by PI, PII and PIII Snake Venom Metalloproteinases: Clues on the Mechanisms of Venom-Induced Hemorrhage
Source: PubMed Central journal article supplement (PMC4409213; doi:10.1371/journal.pntd.0003731), 2015-04-24
Supplement: pntd.0003731.s007.pdf [file pntd.0003731.s007.pdf]

**S7 Table. Membrane proteins identified in wound exudates collected from mice injected with PI, PII or PIII SVMPs.**

| Proteins                                                         | Accession Number | Mol. Mass | Quantitative value |                 |                 |
|------------------------------------------------------------------|------------------|-----------|--------------------|-----------------|-----------------|
|                                                                  |                  |           | P-I                | P-II            | P-III           |
| Ig gamma-1 chain C region, membrane-bound form                   | P01869           | 43 kDa    | 18                 | 15              | 14              |
| Ig gamma-2A chain C region, membrane-bound form                  | P01865           | 44 kDa    | 18                 | 24              | 27              |
| H-2 class I histocompatibility antigen, Q10 alpha chain          | P01898           | 37 kDa    | 7                  | 11              | 8               |
| Isoform 2 of Leukemia inhibitory factor receptor                 | P42703-2         | 81 kDa    | 11                 | 10              | 7               |
| Epidermal growth factor receptor                                 | Q01279           | 135 kDa   | 9                  | 5               | 4               |
| ATP-binding cassette sub-family A member 8-B                     | Q8K440 (+1)      | 183 kDa   | 3                  | 5               | 2               |
| Single-pass membrane and coiled-coil domain-containing protein 3 | Q8BQM7           | 25 kDa    | 0                  | <b><u>3</u></b> | <b><u>6</u></b> |

Values in bold and underlined correspond to proteins for which at least one SVMP induced an increment of at least three times as compared to another SVMP.
